# Supplementary material for: A convergent growth approach to electroactive ferrocene rich carbosilane- and siloxane-based dendrons, dendrimers, and dendronized polymers
Source: Royal Society of Chemistry journal article supplement (doi:10.1039/d2dt03983d), 2023-01-01
Supplement: d2dt03983d1.pdf [file d2dt03983d1.pdf]

## Electronic Supplementary Information (ESI)

# Convergent Growth Approach to Redox-Active Ferrocene Rich Carbosilane- and Siloxane-Based Dendrons, Dendrimers and Dendronized Polymers

Sonia Bruña,<sup>\*,†</sup> Josefina Perles<sup>‡</sup> and Isabel Cuadrado<sup>†</sup>

<sup>†</sup>*Departamento de Química Inorgánica and Institute for Advanced Research in Chemical Sciences (IAdChem), Facultad de Ciencias, Calle Francisco Tomás y Valiente, 7, Universidad Autónoma de Madrid, Ciudad Universitaria de Cantoblanco, 28049, Madrid, Spain.*

<sup>‡</sup>*Laboratorio de Difracción de Rayos X de Monocristal, Servicio Interdepartamental de Investigación (SIIdI), Universidad Autónoma de Madrid, Ciudad Universitaria de Cantoblanco, 28049, Madrid, Spain.*

Correspondence: [sonia.brunna@uam.es](mailto:sonia.brunna@uam.es)

### **CONTENTS**

|                                                                                                          |            |
|----------------------------------------------------------------------------------------------------------|------------|
| Terminology used to represent the siloxane structures .....                                              | S2         |
| <b>1. Synthetic Procedures.....</b>                                                                      | <b>S2</b>  |
| Attempts to synthesize dendrimer <b>6</b> .....                                                          | S2         |
| Attempts to synthesize a second generation dendronized polymer from dendron <b>3</b> .....               | S2         |
| <b>2. Spectra and analysis of compounds 1-9<sub>n</sub> .....</b>                                        | <b>S3</b>  |
| triferrocenylvinylsilane <b>1</b> .....                                                                  | S3         |
| dendron <b>3</b> .....                                                                                   | S3         |
| dendrimer <b>4</b> .....                                                                                 | S6         |
| dendrimer <b>5</b> .....                                                                                 | S9         |
| hydrosilylation of <b>3</b> and Si[OSi(CH <sub>3</sub> ) <sub>2</sub> H] <sub>4</sub> ( <b>I</b> ) ..... | S11        |
| polymer <b>7<sub>n</sub>-9<sub>n</sub></b> .....                                                         | S12        |
| TGA of polymer <b>7<sub>n</sub>-9<sub>n</sub></b> .....                                                  | S15        |
| SEM and EDX analyses of polymers <b>7<sub>n</sub>-9<sub>n</sub></b> .....                                | S16        |
| <b>3. X-Ray Structures of Dendron 3 and Dendrimer 4 .....</b>                                            | <b>S18</b> |
| <b>4. Electrochemistry of dendritic compounds 1-9<sub>n</sub> .....</b>                                  | <b>S22</b> |

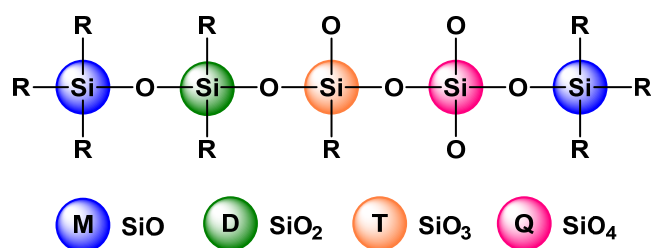

**Scheme 1.** Terminology used to represent the siloxane structures  $R_3SiO_{0.5}$  (M),  $R_2SiO$  (D),  $RSiO_{1.5}$  (T) and  $SiO_2$  (Q).

## 1. Synthetic Procedures

**Attempts to synthesize dendrimer 6.** G1-dendron **3** (79 mg, 0.058 mmol) in 5 mL of toluene, Karstedt's catalyst (10  $\mu$ L), and tetrakis(dimethylsiloxy)silane **I** (4  $\mu$ L, 0.012 mmol) were used. In the initial attempt, the reaction mixture was stirred for 24 h at 70  $^{\circ}$ C, while the second one was heated at 100  $^{\circ}$ C for 72 h. Despite the subsequent precipitation processes, with different mixtures of *n*-hexane/ $CH_2Cl_2$ , the desired dendrimer **6** could not be identified so far. Only dendrimers with different structural defects were identified by MALDI-TOF:  $m/z$  4450.0 (one unfunctionalized branch ended in a Si–OH group),  $m/z$  3080.2 (two unfunctionalized branches, one ended in Si–H and the other in Si–OH),  $m/z$  3096.2 (two unfunctionalized branches ended in Si–OH),  $m/z$  1726.1 (three unfunctionalized branches, two ended in Si–OH and one in Si–H),  $m/z$  1742.1 (three unfunctionalized branches ended in Si–OH).

*Note:* Most likely, the –Si–OH terminal groups, detected for some of the dendrimers with structural defects, were formed under the reaction conditions tested for the hydrosilylation between dendron **3** and siloxane  $Si[OSi(CH_3)_2H]_4$ , which implied high temperature and long reaction times. The Si–H groups that were not able to react with dendron **3**, due to its steric hindrance, did react, given enough time, to form the Si–OH groups in the presence of the Karstedt's catalyst and possible oxygen and/or water traces.

We have previously reported that –Si–H bonds can be transformed into –Si–OH bonds at high temperature, in the presence of Karstedt's catalyst (see Crystals 2022, 12, 1122, <https://doi.org/10.3390/cryst12081122> and references therein, above all: Macromolecules 2009, 42, 9199–9203 <https://doi.org/10.1021/ma9018608>).

**Attempts to synthesize a second generation dendronized polymer from dendron 3.** G1-dendron **3** (80 mg, 0.059 mmol), toluene (4 mL), Karstedt's catalyst (10  $\mu$ L), and poly(methylhydrosiloxane) **II** (3  $\mu$ L, 0.012 mmol) were used. The reaction mixture was stirred for 45 h at 100  $^{\circ}$ C and the oily residue obtained was repeatedly dissolved in the minimum amount of  $CH_2Cl_2$  and precipitated into methanol. In this case, isolation of pure dendrimeric compounds from the multicomponent mixtures proved to be a very difficult task.

## 2. Spectra and analysis of compounds 1-9<sub>n</sub>

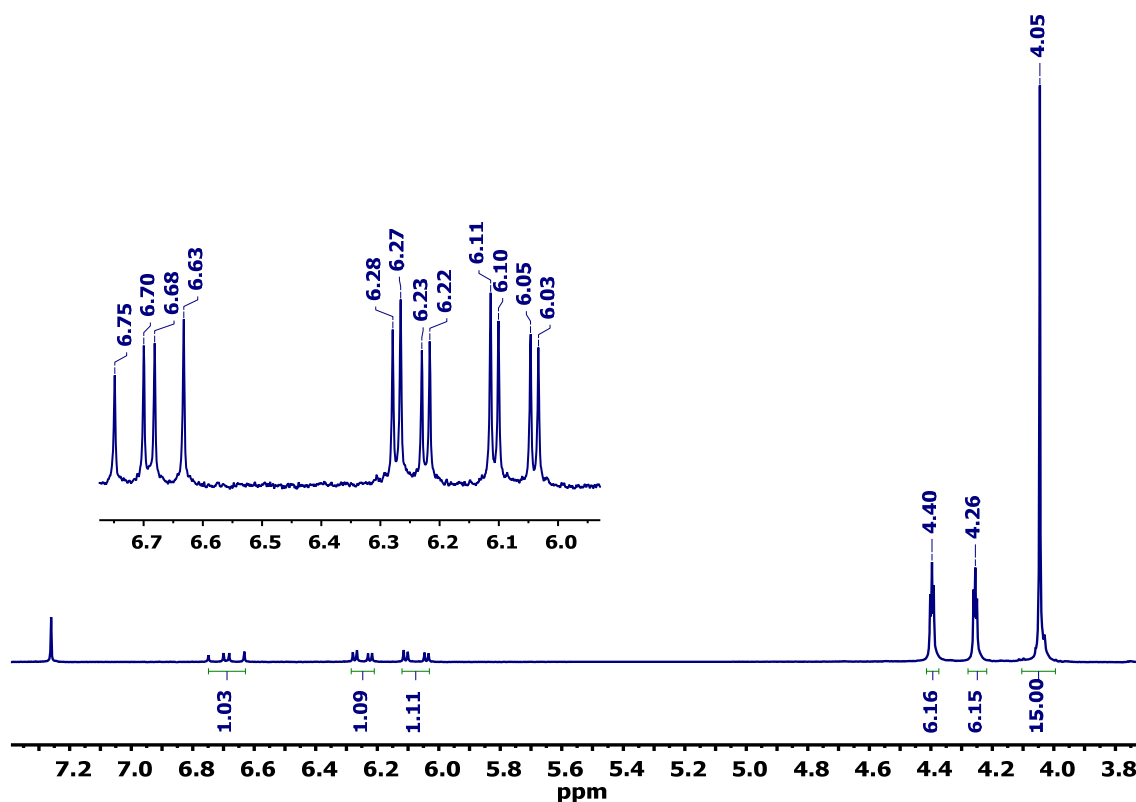

Figure S1: <sup>1</sup>H NMR spectrum of triferrrocenylnylsilane 1 (300 MHz, CDCl<sub>3</sub>).

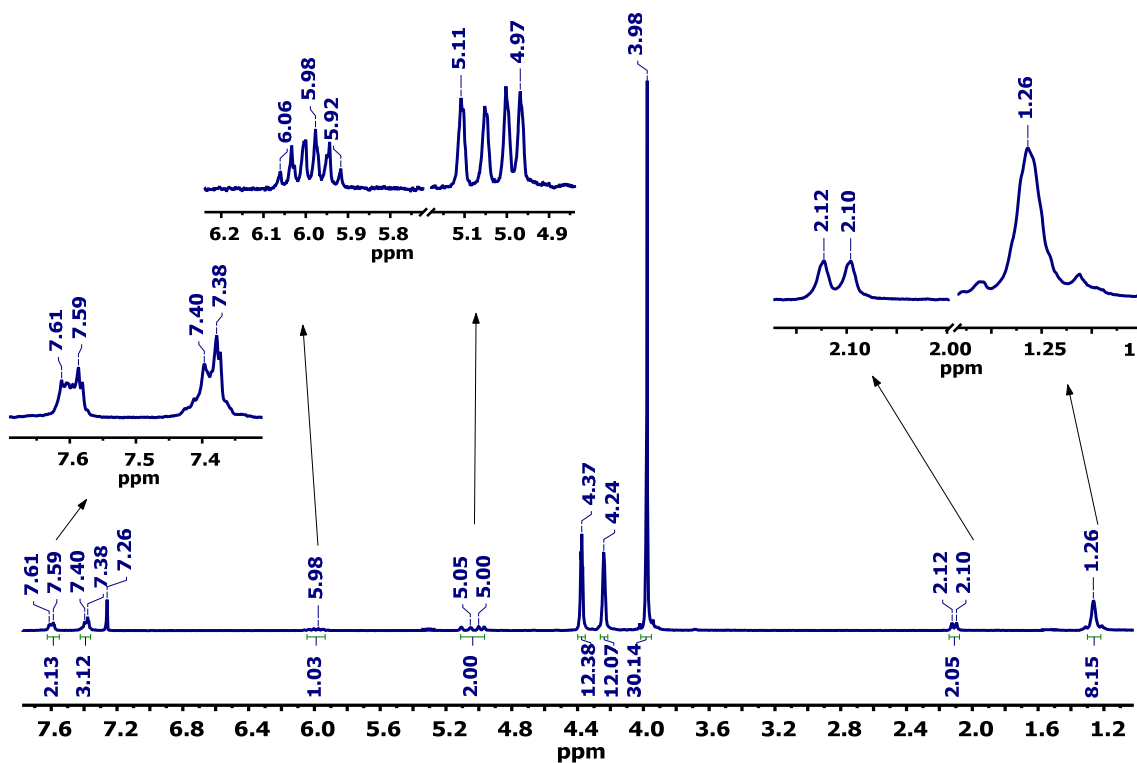

Figure S2: <sup>1</sup>H NMR spectrum of dendron 3 (300 MHz, CDCl<sub>3</sub>).

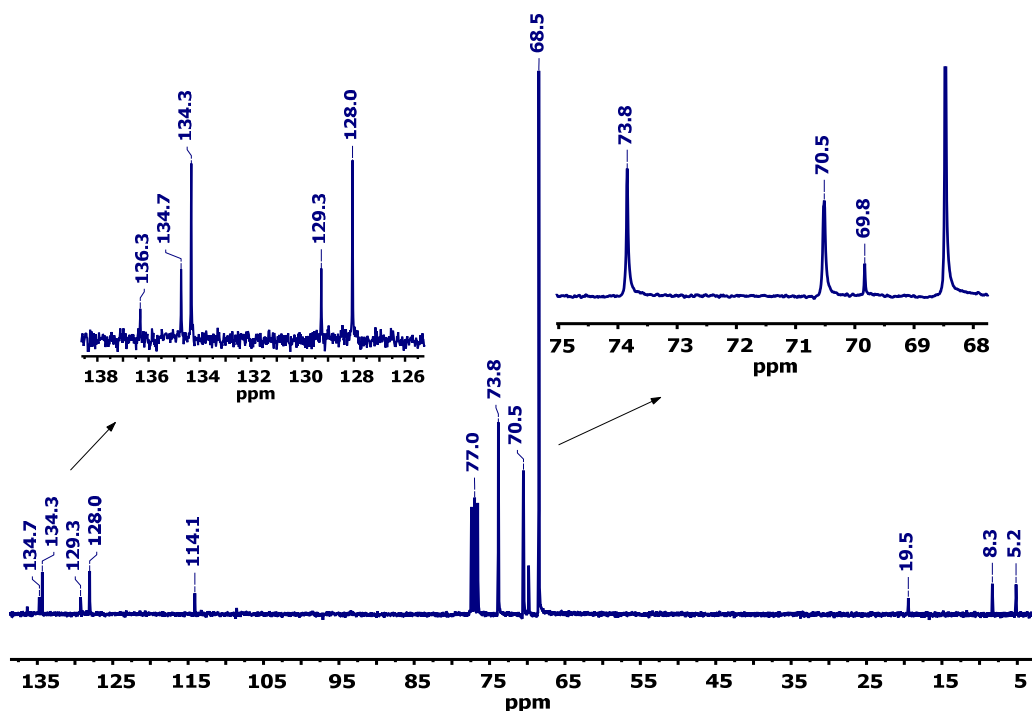

Figure S3:  $^{13}\text{C}\{^1\text{H}\}$  NMR spectrum of dendron **3** (75 MHz,  $\text{CDCl}_3$ ).

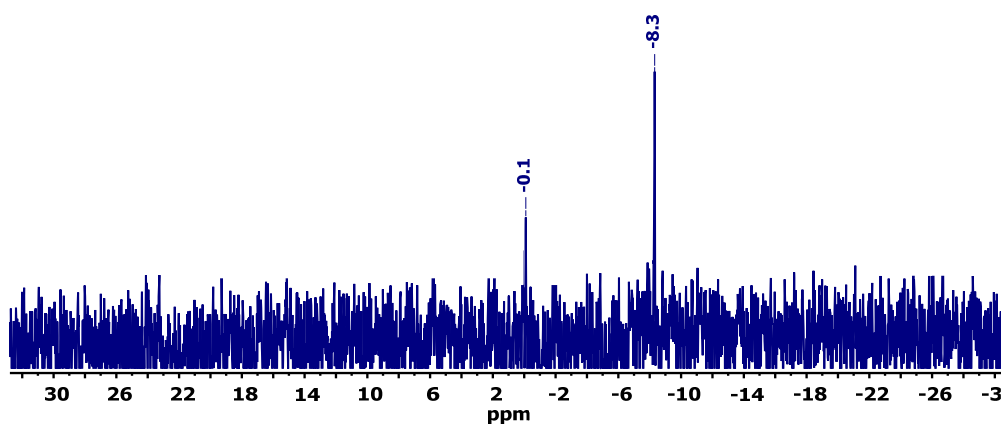

Figure S4:  $^{29}\text{Si}\{^1\text{H}\}$  NMR spectrum of dendron **3** (59.6 MHz,  $\text{CDCl}_3$ ).

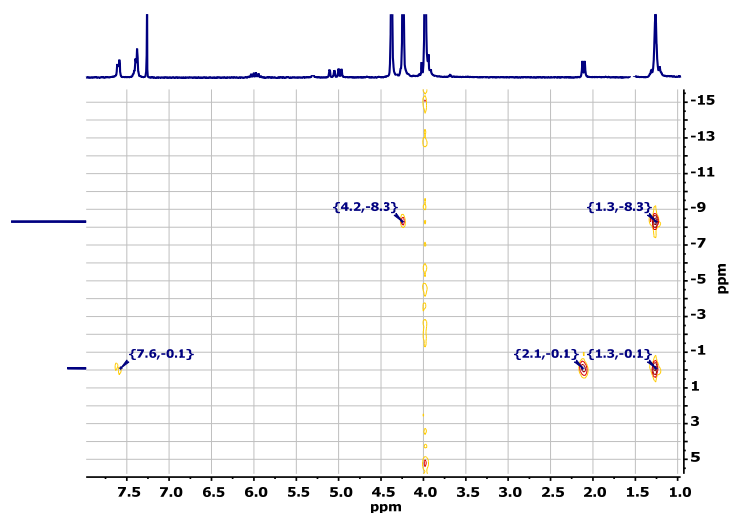

Figure S5:  $\{^1\text{H}-^{29}\text{Si}\}$  HMBC spectrum of dendron **3** (300 MHz, 75 MHz,  $\text{CDCl}_3$ ).

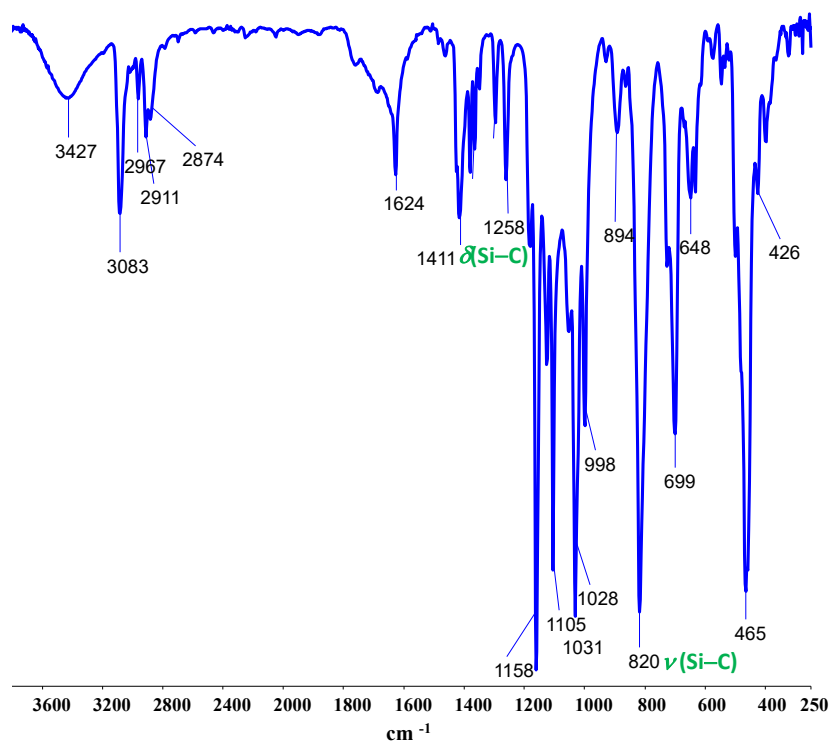

**Figure S6:** IR spectrum (KBr) of dendron **3**.

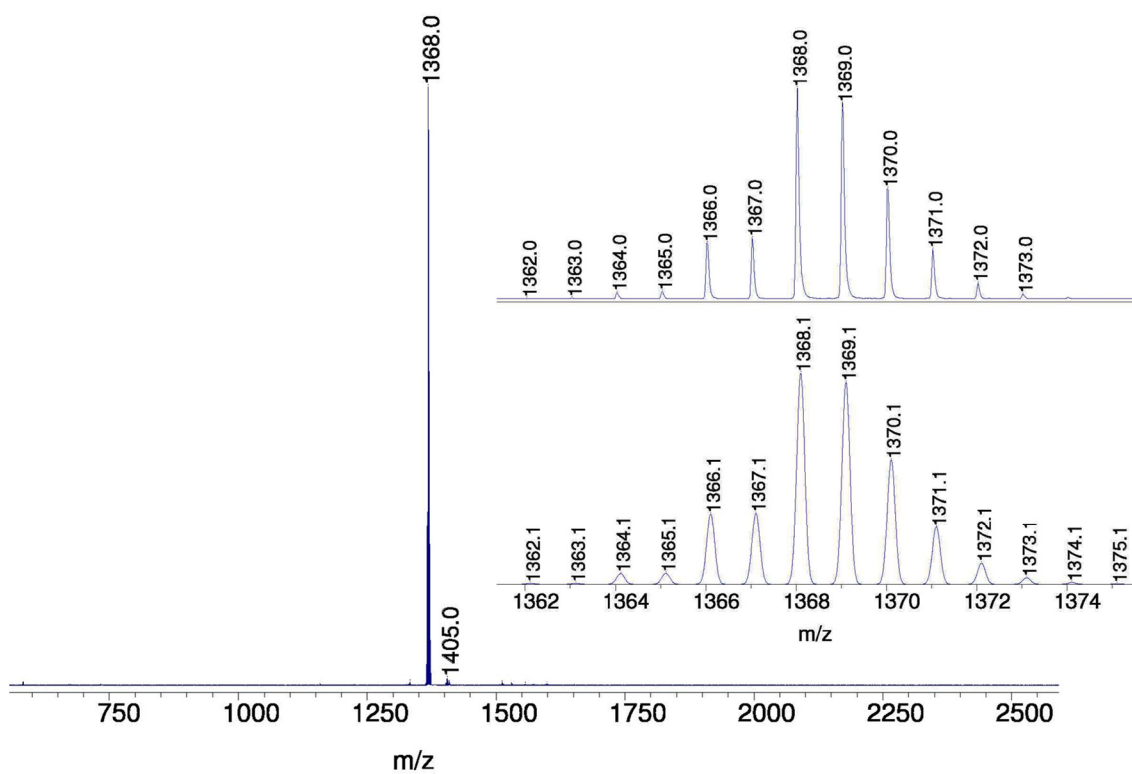

**Figure S7:** MALDI-TOF mass spectrometry of dendron **3**. Inset: isotopic distribution of the molecular ion peak (top: experimental; bottom: calculated).

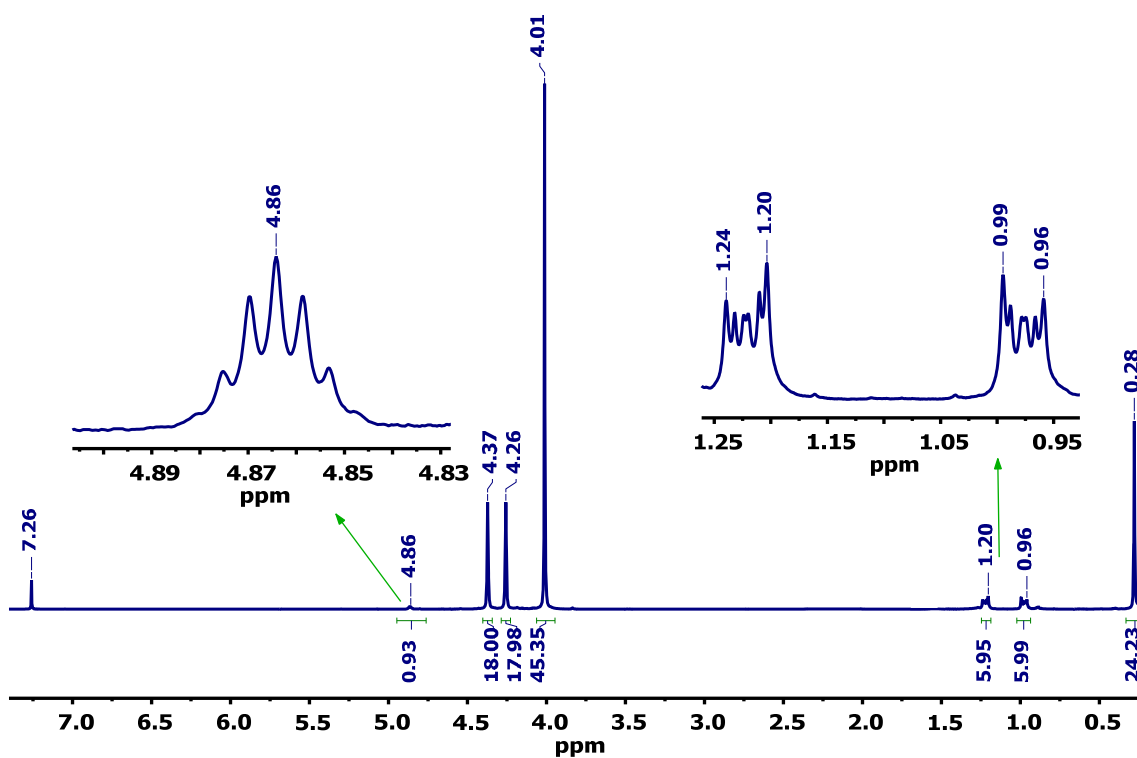

Figure S8:  $^1\text{H}$  NMR spectrum of dendrimer 4 (500 MHz,  $\text{CDCl}_3$ ).

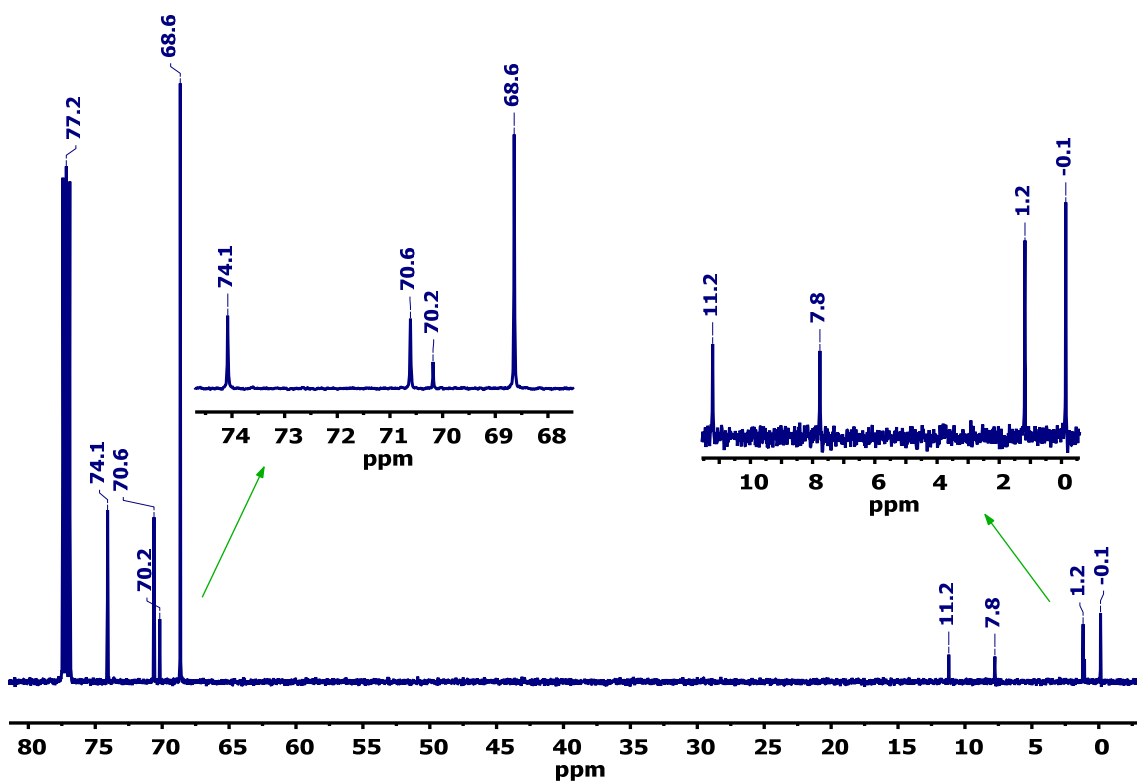

Figure S9:  $^{13}\text{C}\{^1\text{H}\}$  NMR spectrum of dendrimer 4 (125 MHz,  $\text{CDCl}_3$ ).

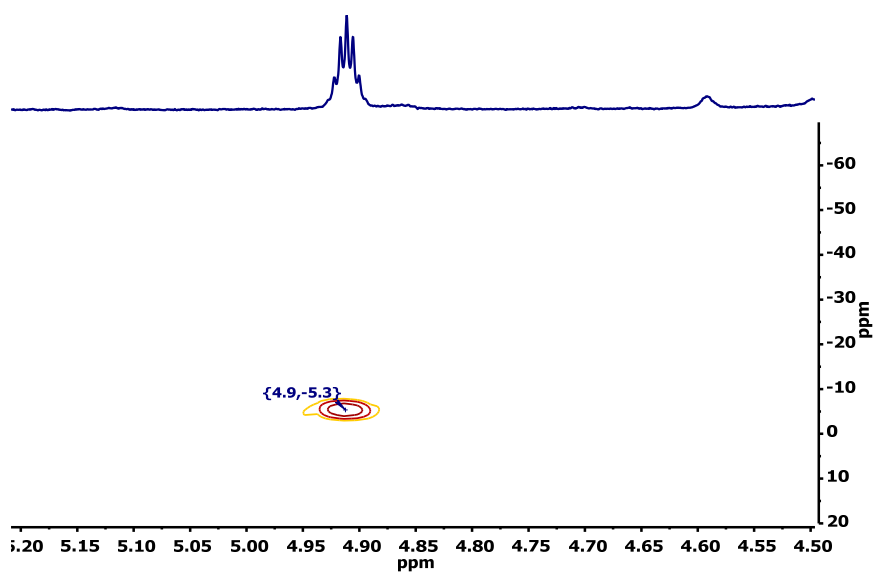

Figure S10:  $\{^1\text{H}-^{29}\text{Si}\}$  HMQC spectrum of dendrimer 4 (500 MHz, 99 MHz,  $\text{CDCl}_3$ ).

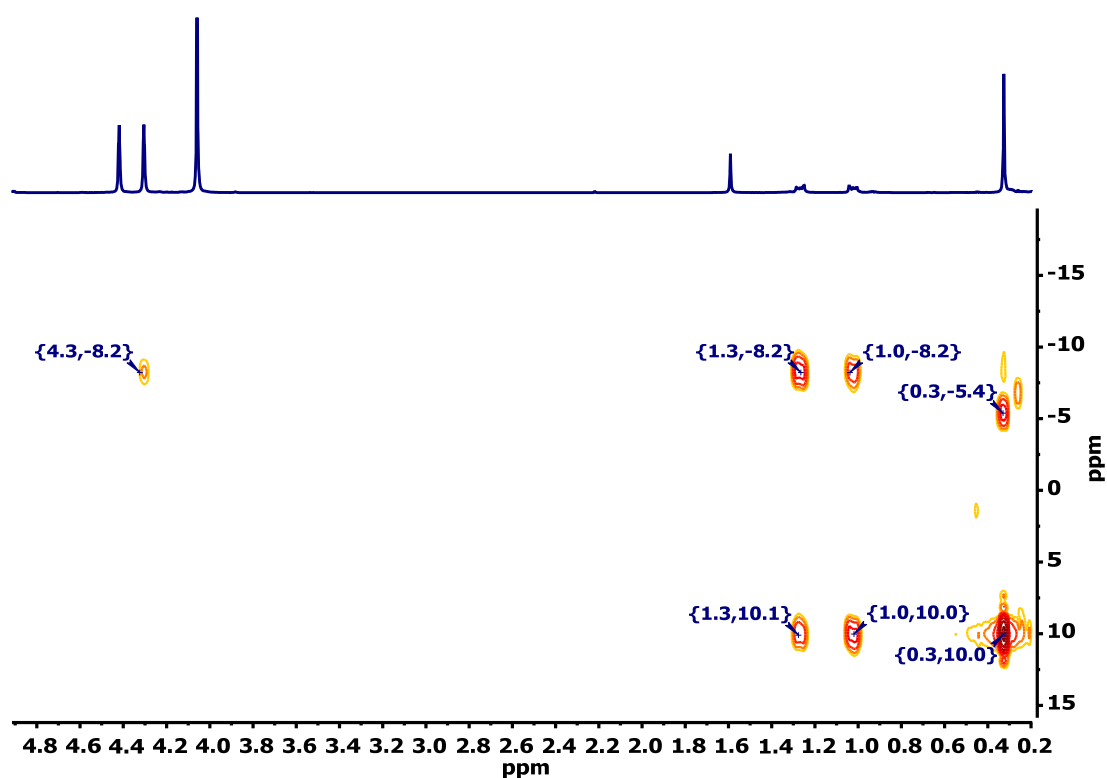

Figure S11:  $\{^1\text{H}-^{29}\text{Si}\}$  HMBC spectrum of dendrimer 4 (500 MHz, 99 MHz,  $\text{CDCl}_3$ ).

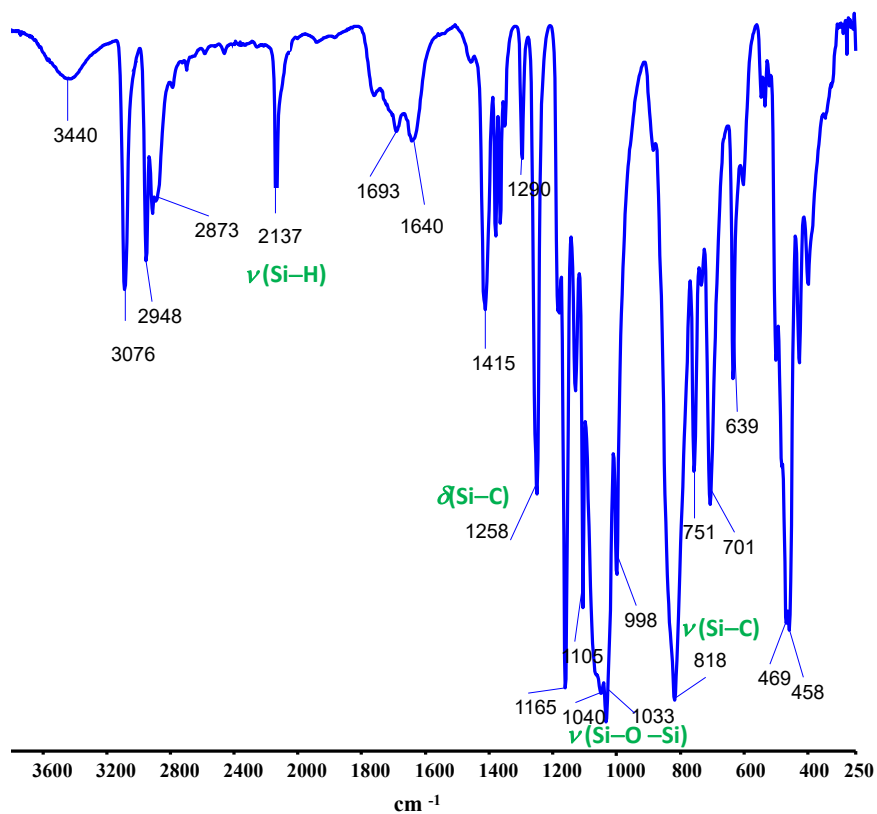

**Figure S12:** IR spectrum (KBr) of dendrimer **4**.

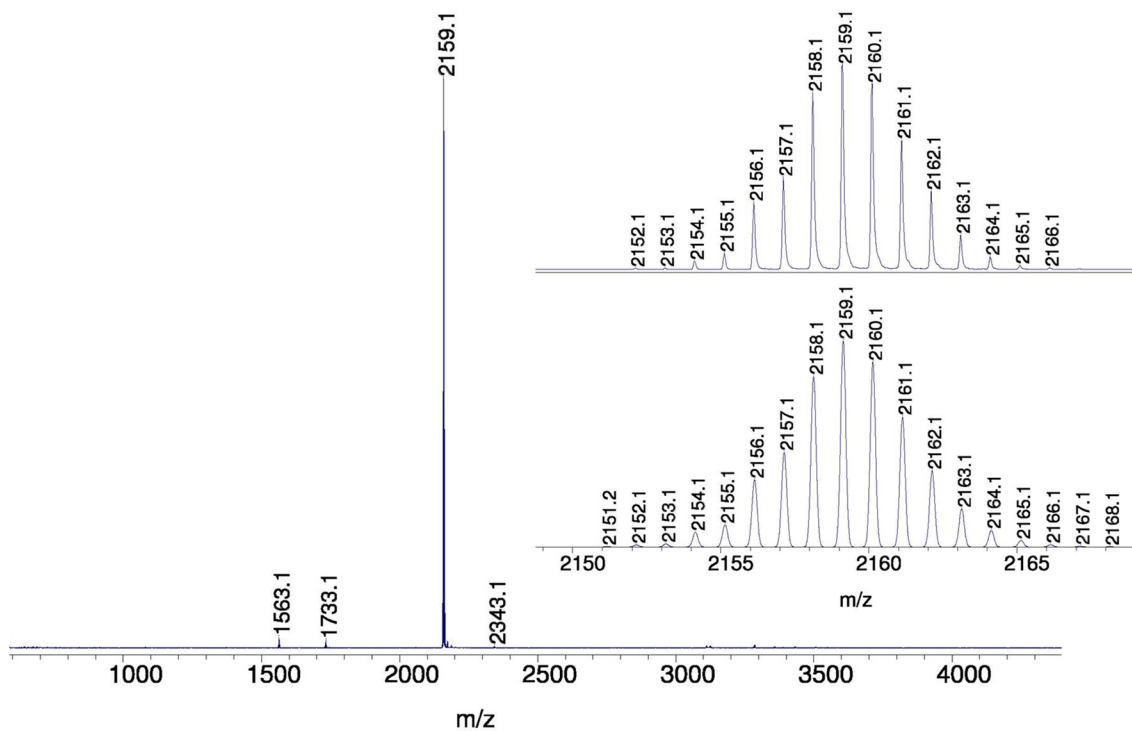

**Figure S13:** MALDI-TOF mass spectrometry of dendrimer **4**. Inset: isotopic distribution of the molecular ion peak (top: experimental; bottom: calculated).



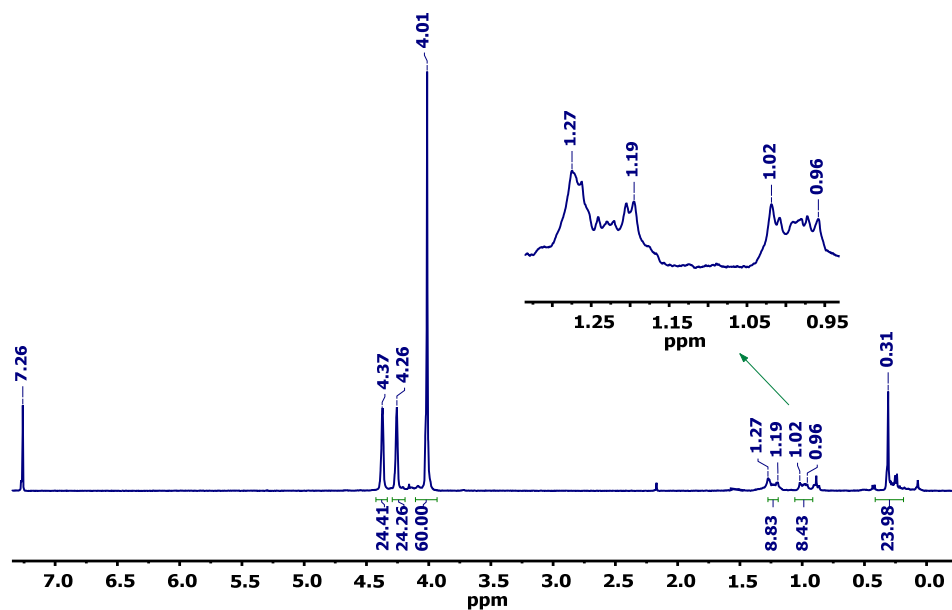

Figure S14:  $^1\text{H}$  NMR spectrum of dendrimer 5 (300 MHz,  $\text{CDCl}_3$ ).

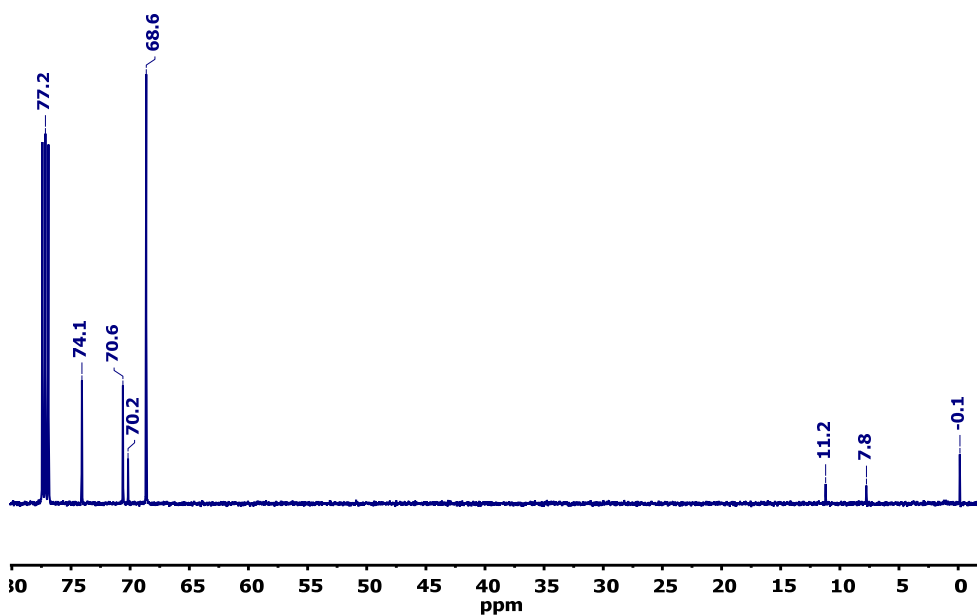

Figure S15:  $^{13}\text{C}\{^1\text{H}\}$  NMR spectrum of dendrimer 5 (75 MHz,  $\text{CDCl}_3$ ).

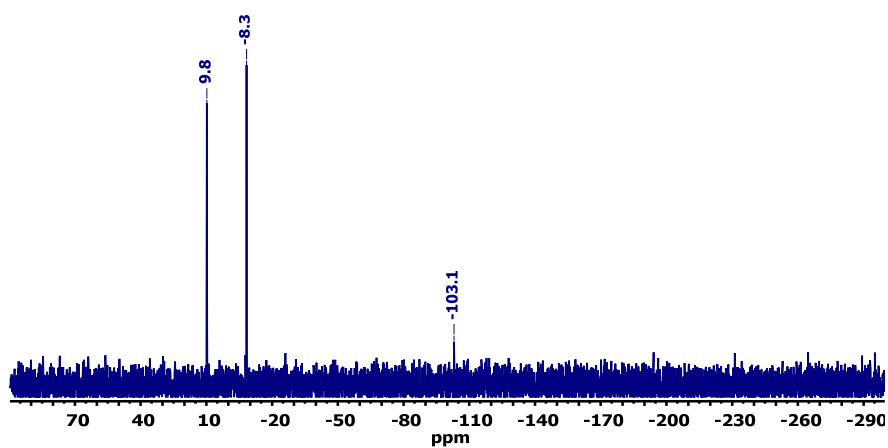

Figure S16:  $^{29}\text{Si}\{^1\text{H}\}$  NMR spectrum of dendrimer 5 (59.6 MHz,  $\text{CDCl}_3$ ).

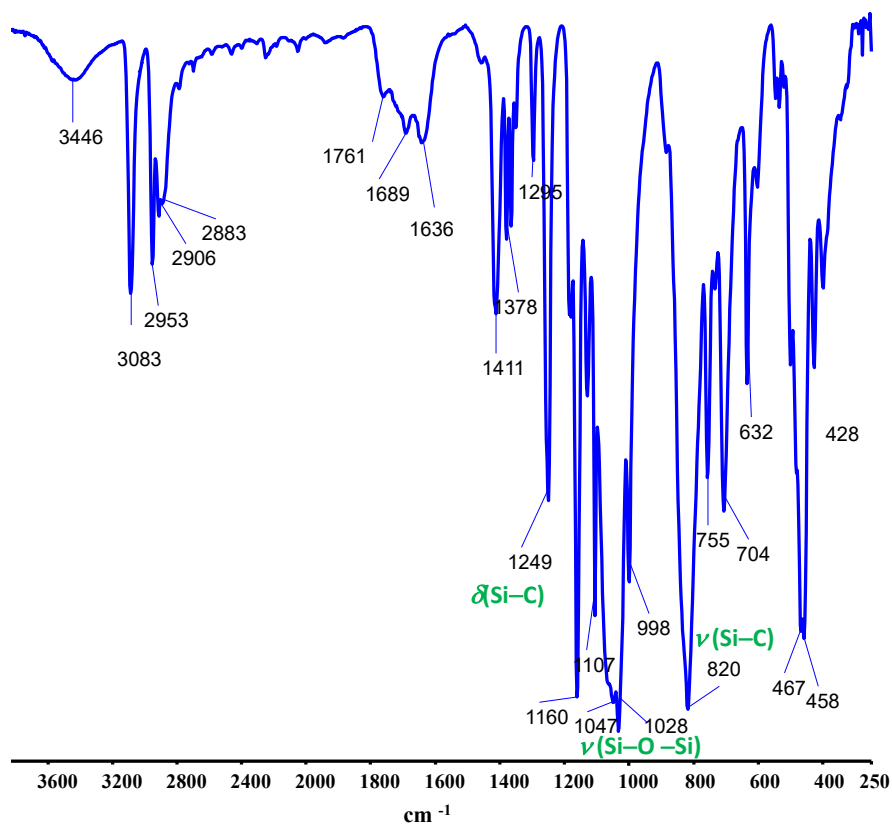

Figure S17: IR spectrum (KBr) of dendrimer 5.

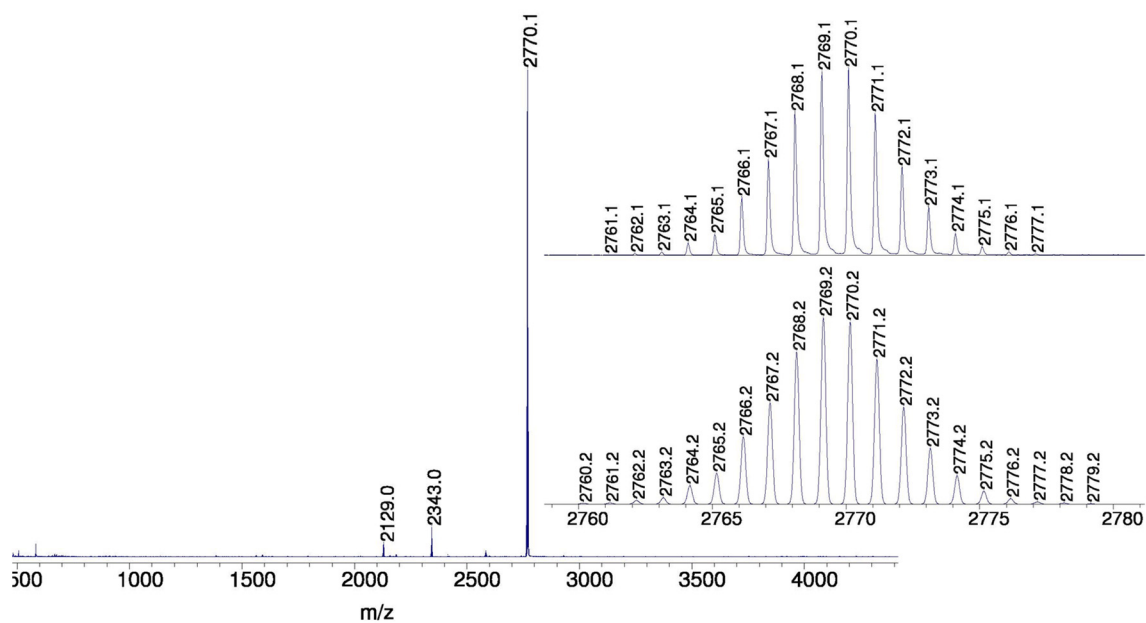

Figure S18: MALDI-TOF mass spectrometry of dendrimer 5. Inset: isotopic distribution of the molecular ion peak (top: experimental; bottom: calculated).

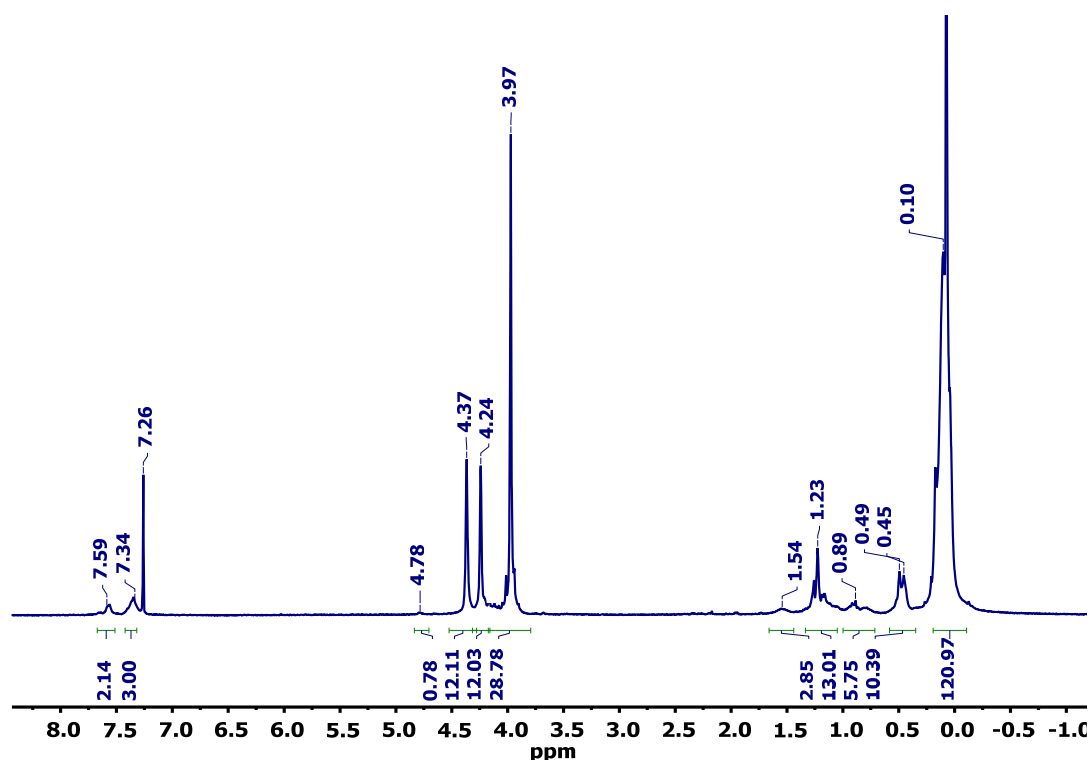

**Figure S19:**  $^1\text{H}$  NMR spectrum of the reaction product resulting from the hydrosilylation of **3** and  $\text{Si}[\text{OSi}(\text{CH}_3)_2\text{H}]_4$  (**I**): fraction obtained after the orange oil was dissolved in a small amount of  $\text{CH}_2\text{Cl}_2$  and precipitated into *n*-hexane (300 MHz,  $\text{CDCl}_3$ ).

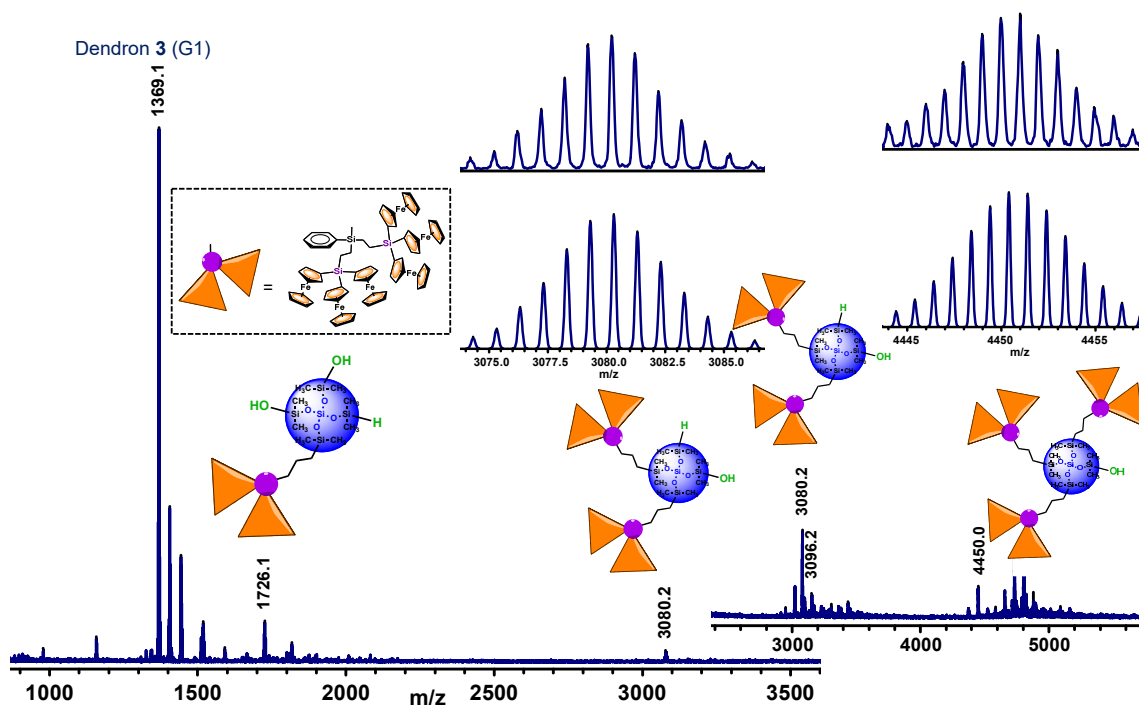

**Figure S20.** MALDI-TOF mass spectrum of the reaction product resulting from the hydrosilylation of **3** and  $\text{Si}[\text{OSi}(\text{CH}_3)_2\text{H}]_4$  (**I**). The insets show the experimental and calculated isotopic patterns of peaks at  $m/z$  3080.2 and 4450.0.

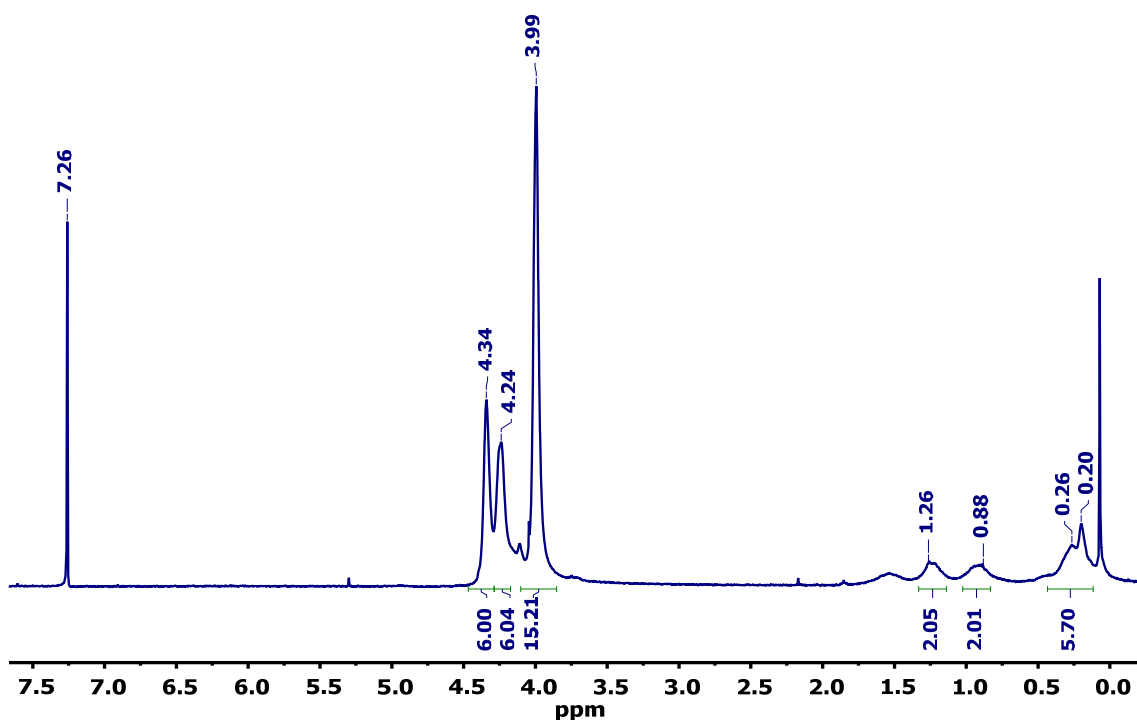

**Figure S21:**  $^1\text{H}$  NMR spectrum of the reaction products  $7_n$ – $9_n$  from the hydrosilylation reaction of dendron **1** (**G0**) and poly(methylhydroxysilane) **II** (300 MHz,  $\text{CDCl}_3$ ).

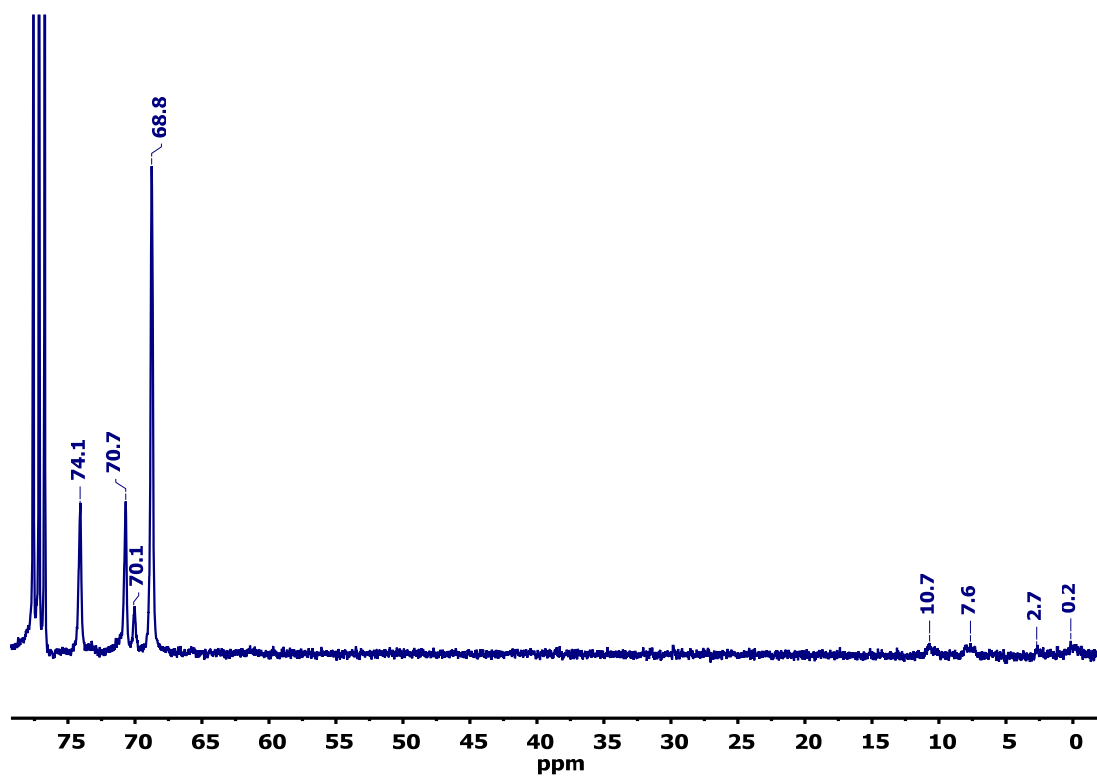

**Figure S22:**  $^{13}\text{C}\{^1\text{H}\}$  NMR spectrum of the reaction products  $7_n$ – $9_n$  from the hydrosilylation reaction of dendron **1** (**G0**) and poly(methylhydroxysilane) **II** (75 MHz,  $\text{CDCl}_3$ ).

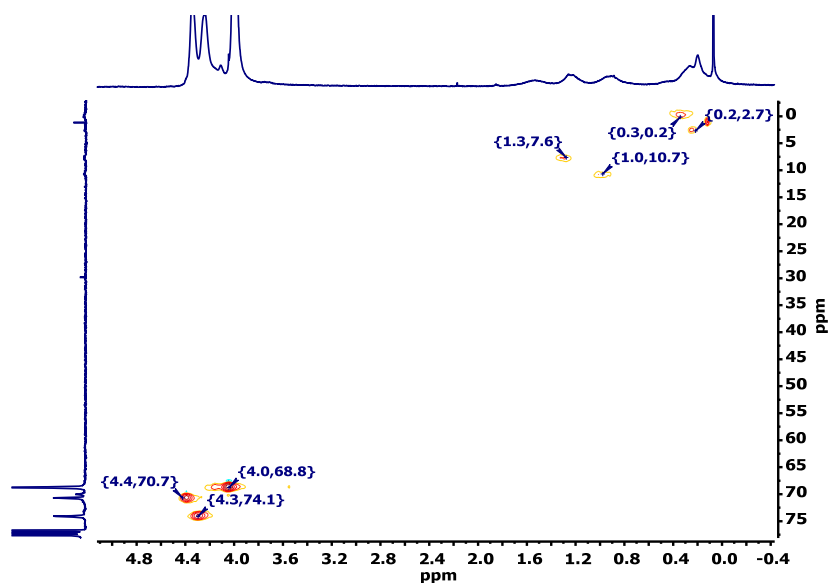

**Figure S23:**  $\{^1\text{H}-^{13}\text{C}\}$  HMQC spectrum of the reaction products  $7_n-9_n$  from the hydrosilylation reaction of dendron **1 (G0)** and poly(methylhydroxysilane) **II** (500 MHz, 125 MHz,  $\text{CDCl}_3$ ).

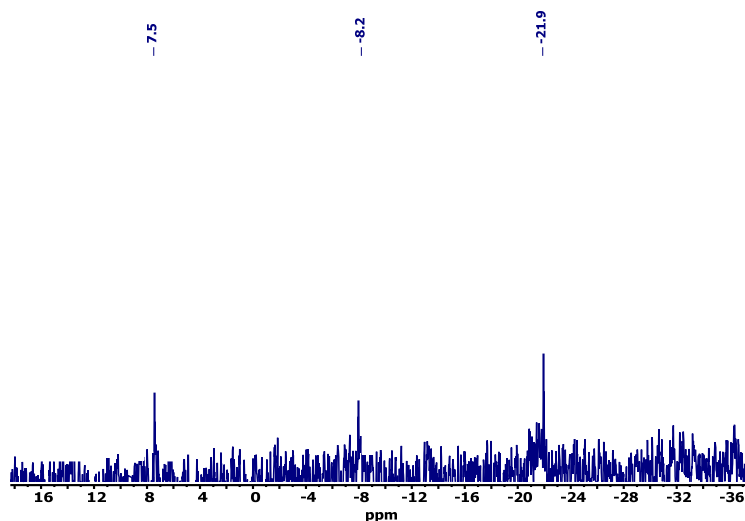

**Figure S24:**  $^{29}\text{Si}\{^1\text{H}\}$  NMR spectrum of the reaction products  $7_n-9_n$  from the hydrosilylation reaction of dendron **1 (G0)** and poly(methylhydroxysilane) **II** (59.6 MHz,  $\text{CDCl}_3$ ).

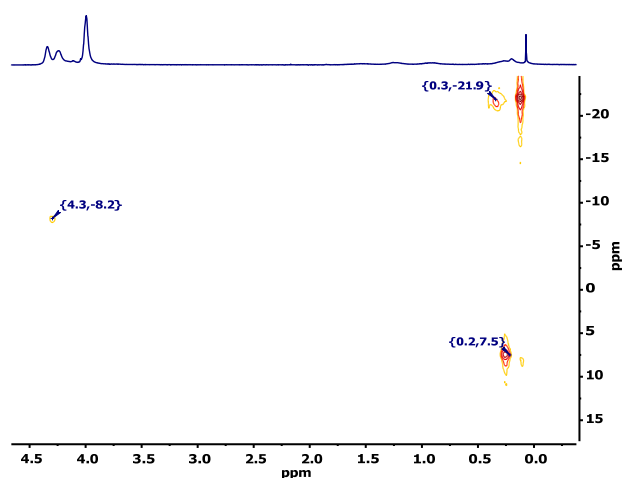

**Figure S25:**  $\{^1\text{H}-^{29}\text{Si}\}$  HMBC spectrum of the reaction products  $7_n-9_n$  from the hydrosilylation reaction of dendron **1 (G0)** and poly(methylhydroxysilane) **II** (500 MHz, 99 MHz,  $\text{CDCl}_3$ ).

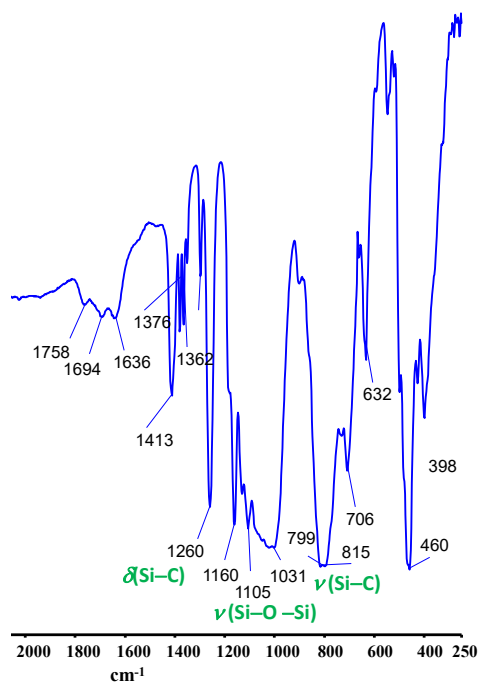

Figure S26: IR spectrum (KBr) of the reaction products  $7_n$ – $9_n$  from the hydrosilylation reaction of dendron **1** (**G0**) and poly(methylhydroxysilane) **II**.

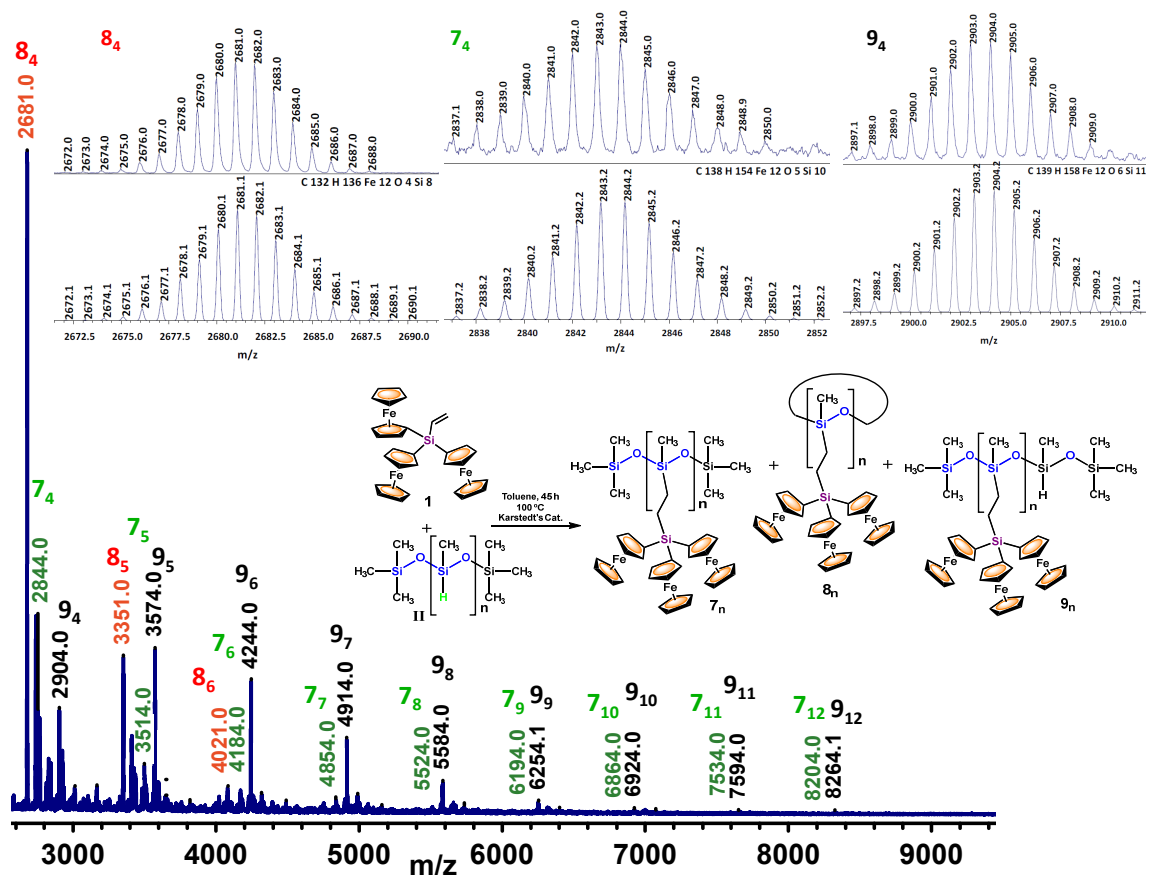

Figure S27: MALDI-TOF of  $7_n$ – $9_n$  from the hydrosilylation reaction of dendron **1** (**G0**) and poly(methylhydroxysilane) **II**. The insets show the experimental and calculated isotopic patterns of the peaks at  $m/z$  2681.0, 2844.0 and 2904.0.

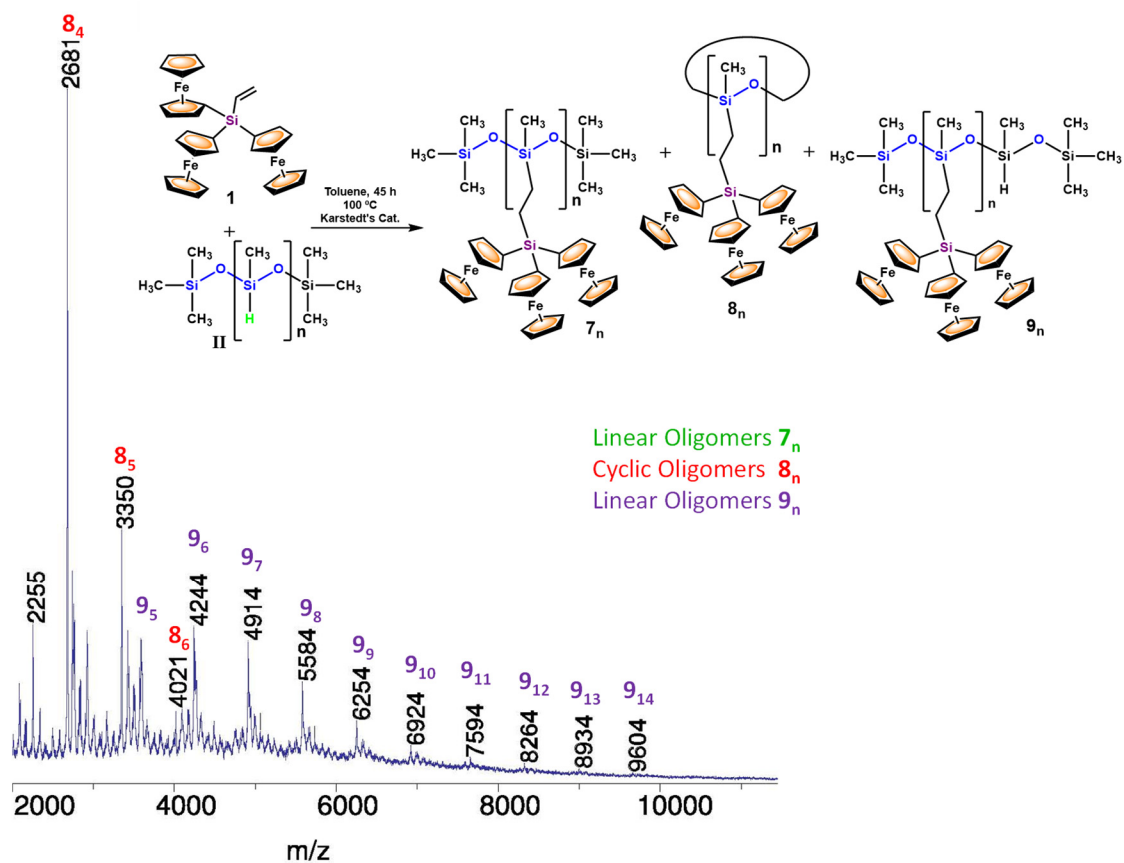

**Figure S28:** MALDI-TOF mass spectrometry of the reaction products  $7_n$ – $9_n$  from the hydrosilylation reaction of dendron **1** (**GO**) and poly(methylhydroxysilane) **II** after the first precipitate was dissolved again in a small amount of  $\text{CH}_2\text{Cl}_2$  and precipitated into methanol.  $m/z$  2000 deflection.

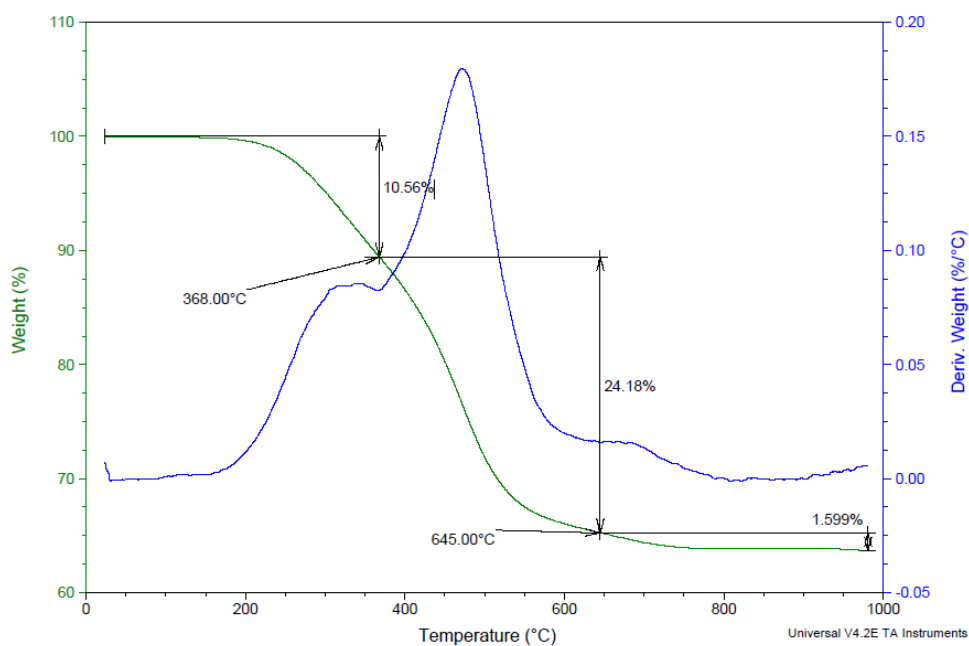

**Figure S29.** TGA thermograms of the mixture of dendronized polymers  $7_n$ – $9_n$  under  $\text{N}_2$  at a heating rate of  $10\text{ }^\circ\text{C min}^{-1}$ .

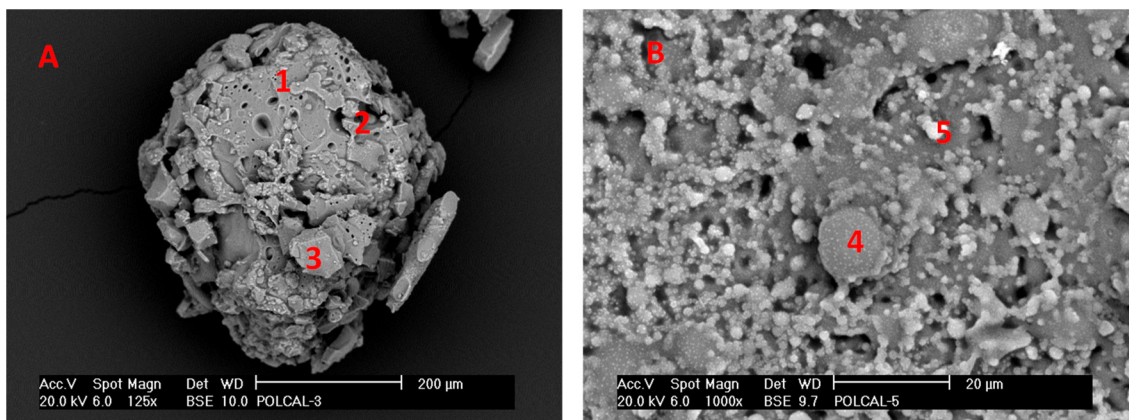

**Figure S30.** SEM images of the ceramic material obtained by the pyrolysis of the mixture of dendronized polymers  $7_n-9_n$ , under nitrogen atmosphere.

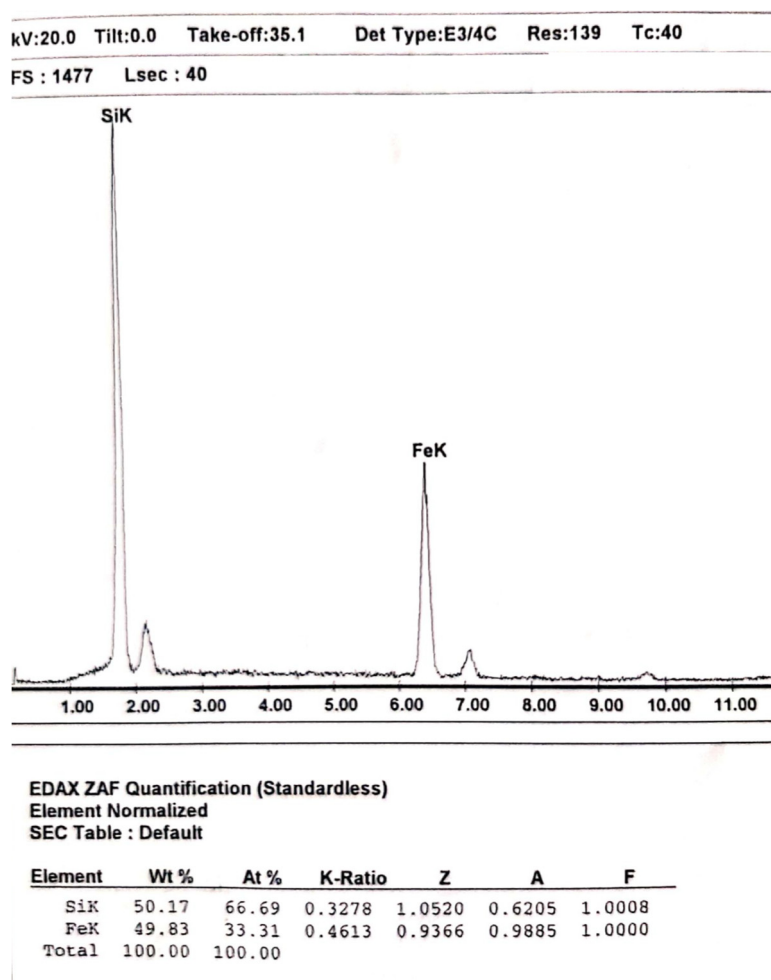

**Figure S31.** EDX analyses of the ceramic residue obtained by the pyrolysis of  $7_n-9_n$  (at 1000°C under nitrogen atmosphere), point 1 in Figure S30A.



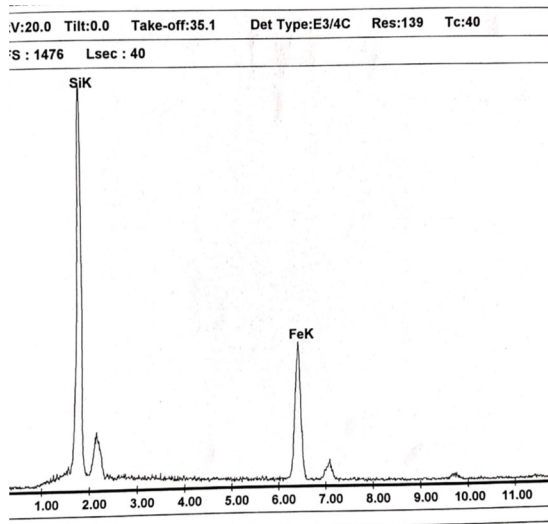

EDAX ZAF Quantification (Standardless)  
Element Normalized  
SEC Table : Default

| Element | Wt %   | At %   | K-Ratio | Z      | A      | F      |
|---------|--------|--------|---------|--------|--------|--------|
| SiK     | 52.55  | 68.77  | 0.3494  | 1.0493 | 0.6332 | 1.0008 |
| FeK     | 47.45  | 31.23  | 0.4378  | 0.9339 | 0.9879 | 1.0000 |
| Total   | 100.00 | 100.00 |         |        |        |        |

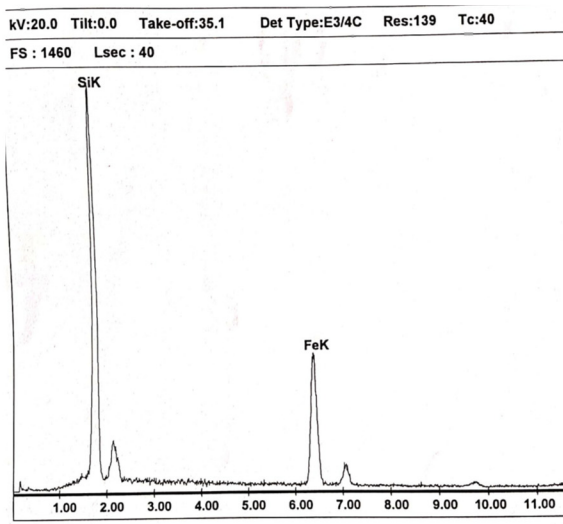

EDAX ZAF Quantification (Standardless)  
Element Normalized  
SEC Table : Default

| Element | Wt %   | At %   | K-Ratio | Z      | A      | F      |
|---------|--------|--------|---------|--------|--------|--------|
| SiK     | 52.85  | 69.03  | 0.3522  | 1.0490 | 0.6349 | 1.0008 |
| FeK     | 47.15  | 30.97  | 0.4348  | 0.9336 | 0.9879 | 1.0000 |
| Total   | 100.00 | 100.00 |         |        |        |        |

**Figure S32.** EDX analyses of the ceramic residue obtained by the pyrolysis of  $7_n-9_n$  (at  $1000^\circ\text{C}$  under nitrogen atmosphere), points 2 (left) and 3 (right) of the Figure S30A.

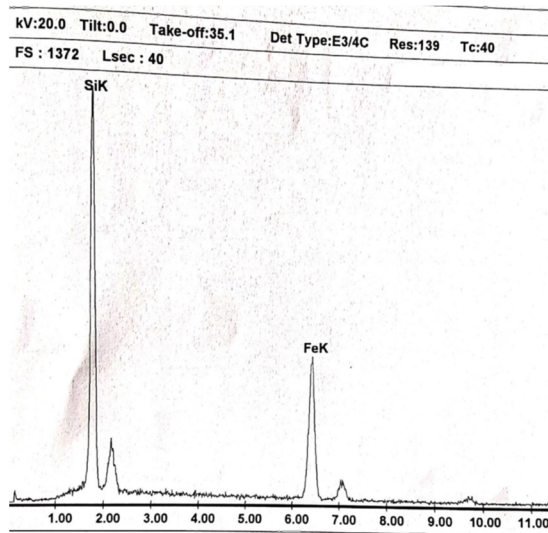

EDAX ZAF Quantification (Standardless)  
Element Normalized  
SEC Table : Default

| Element | Wt %   | At %   | K-Ratio | Z      | A      | F      |
|---------|--------|--------|---------|--------|--------|--------|
| SiK     | 51.79  | 68.11  | 0.3424  | 1.0502 | 0.6291 | 1.0008 |
| FeK     | 48.21  | 31.89  | 0.4453  | 0.9348 | 0.9881 | 1.0000 |
| Total   | 100.00 | 100.00 |         |        |        |        |

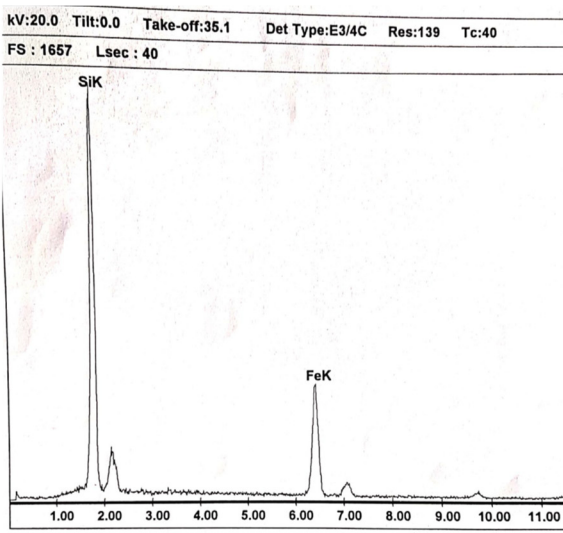

EDAX ZAF Quantification (Standardless)  
Element Normalized  
SEC Table : Default

| Element | Wt %   | At %   | K-Ratio | Z      | A      | F      |
|---------|--------|--------|---------|--------|--------|--------|
| SiK     | 56.73  | 72.27  | 0.3893  | 1.0446 | 0.6565 | 1.0007 |
| FeK     | 43.27  | 27.73  | 0.3969  | 0.9292 | 0.9870 | 1.0000 |
| Total   | 100.00 | 100.00 |         |        |        |        |

**Figure S33.** EDX analyses of the ceramic residue obtained by the pyrolysis of  $7_n-9_n$  (at  $1000^\circ\text{C}$  under nitrogen atmosphere), points 4 (left) and 5 (right) of the Figure S30B.

### 3. X-Ray Structures of Dendron 3 (CCDC 2105207) and Dendrimer 4 (CCDC 2105208)

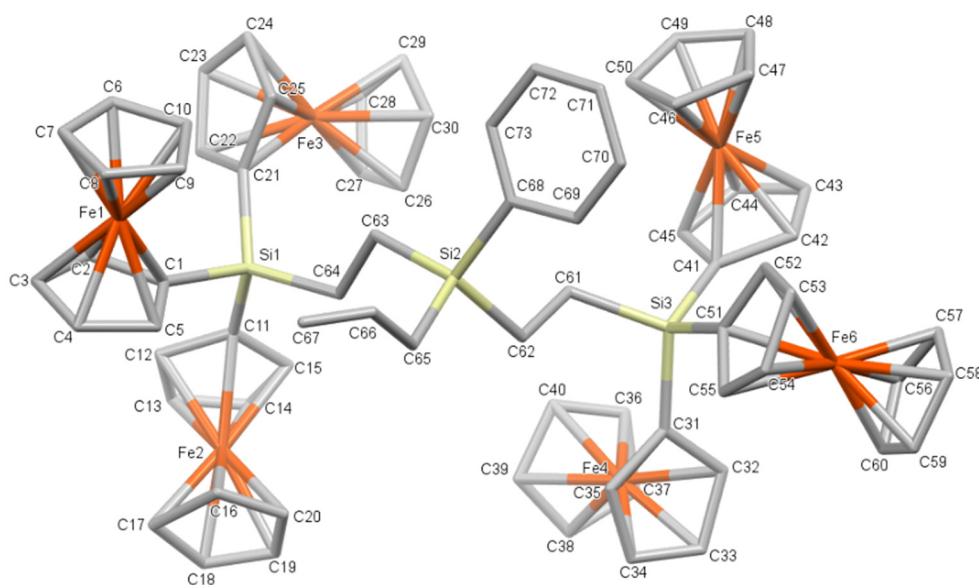

**Figure S34.** Asymmetric unit of Dendron **3** with atoms labelled. Hydrogen atoms have been omitted for clarity.

**Table S1.** Sample and crystal data for **3**.

|                        |                                |                           |
|------------------------|--------------------------------|---------------------------|
| CCDC code              | 2105207                        |                           |
| Chemical formula       | $C_{73}H_{72}Fe_6Si_3$         |                           |
| Formula weight         | 1368.67 g/mol                  |                           |
| Temperature            | 296(2) K                       |                           |
| Wavelength             | 0.71073 Å                      |                           |
| Crystal size           | 0.080 x 0.140 x 0.250 mm       |                           |
| Crystal habit          | clear intense orange prismatic |                           |
| Crystal system         | monoclinic                     |                           |
| Space group            | $P2_1/n$                       |                           |
| Unit cell dimensions   | $a = 20.1982(4)$ Å             | $\alpha = 90^\circ$       |
|                        | $b = 12.5410(2)$ Å             | $\beta = 95.546(1)^\circ$ |
|                        | $c = 24.6180(5)$ Å             | $\gamma = 90^\circ$       |
| Volume                 | $6206.7(2)$ Å <sup>3</sup>     |                           |
| Z                      | 4                              |                           |
| Density (calculated)   | 1.465 g/cm <sup>3</sup>        |                           |
| Absorption coefficient | 1.466 mm <sup>-1</sup>         |                           |
| F(000)                 | 2832                           |                           |

**Table S2. Data collection and structure refinement for 3.**

|                                   |                                                                         |                                                   |
|-----------------------------------|-------------------------------------------------------------------------|---------------------------------------------------|
| Theta range for data collection   | 1.37 to 25.40°                                                          |                                                   |
| Index ranges                      | -24<=h<=22, -15<=k<=15, -29<=l<=29                                      |                                                   |
| Reflections collected             | 53353                                                                   |                                                   |
| Independent reflections           | 11423 [R(int) = 0.0627]                                                 |                                                   |
| Structure solution technique      | direct methods                                                          |                                                   |
| Structure solution program        | SHELXS-97 (Sheldrick, 2008)                                             |                                                   |
| Refinement method                 | Full-matrix least-squares on F <sup>2</sup>                             |                                                   |
| Refinement program                | SHELXL-2018/3 (Sheldrick, 2018)                                         |                                                   |
| Function minimized                | $\Sigma w(F_o^2 - F_c^2)^2$                                             |                                                   |
| Data / restraints / parameters    | 11423 / 5 / 730                                                         |                                                   |
| Goodness-of-fit on F <sup>2</sup> | 1.022                                                                   |                                                   |
| Final R indices                   | 7071 data;  >2 $\sigma$ (I)                                             | R <sub>1</sub> = 0.0620, wR <sub>2</sub> = 0.1540 |
|                                   | all data                                                                | R <sub>1</sub> = 0.1128, wR <sub>2</sub> = 0.1851 |
| Weighting scheme                  | $w=1/[\sigma^2(F_o^2)+(0.0826P)^2+12.7017P]$ where $P=(F_o^2+2F_c^2)/3$ |                                                   |
| Largest diff. peak and hole       | 2.533 and -1.612 eÅ <sup>-3</sup>                                       |                                                   |
| R.M.S. deviation from mean        | 0.091 eÅ <sup>-3</sup>                                                  |                                                   |

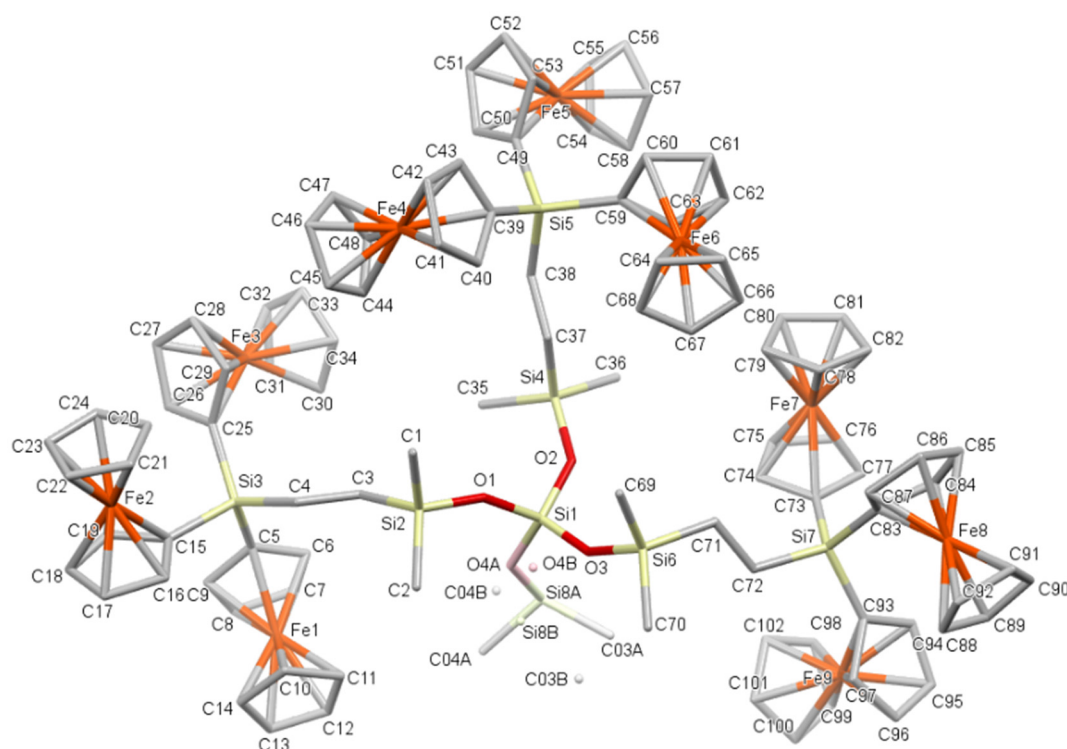

**Figure S35.** Asymmetric unit of Dendrimer **4** with atoms labelled. Hydrogen atoms have been omitted for clarity. Atoms O4, Si8, C03 and C04 (depicted in lighter shades) are disordered in two positions A and B with 60% and 40% occupation respectively.

**Table S3. Sample and crystal data for 4.**

|                        |                                                                                  |                           |
|------------------------|----------------------------------------------------------------------------------|---------------------------|
| CCDC code              | 2105208                                                                          |                           |
| Chemical formula       | C <sub>104</sub> H <sub>118</sub> Fe <sub>9</sub> O <sub>4</sub> Si <sub>8</sub> |                           |
| Formula weight         | 2159.35 g/mol                                                                    |                           |
| Temperature            | 296(2) K                                                                         |                           |
| Wavelength             | 0.71073 Å                                                                        |                           |
| Crystal size           | 0.010 x 0.040 x 0.220 mm                                                         |                           |
| Crystal habit          | clear light orange needle                                                        |                           |
| Crystal system         | monoclinic                                                                       |                           |
| Space group            | <i>P</i> 2 <sub>1</sub> / <i>n</i>                                               |                           |
| Unit cell dimensions   | <i>a</i> = 30.048(1) Å                                                           | $\alpha = 90^\circ$       |
|                        | <i>b</i> = 9.2412(2) Å                                                           | $\beta = 91.762(1)^\circ$ |
|                        | <i>c</i> = 35.879(1) Å                                                           | $\gamma = 90^\circ$       |
| Volume                 | 9958.2(5) Å <sup>3</sup>                                                         |                           |
| Z                      | 4                                                                                |                           |
| Density (calculated)   | 1.440 g/cm <sup>3</sup>                                                          |                           |
| Absorption coefficient | 1.418 mm <sup>-1</sup>                                                           |                           |
| F(000)                 | 4480                                                                             |                           |

**Table S4. Data collection and structure refinement for 4.**

|                                   |                                                                        |                                                   |
|-----------------------------------|------------------------------------------------------------------------|---------------------------------------------------|
| Theta range for data collection   | 1.85 to 25.38°                                                         |                                                   |
| Index ranges                      | -34<= <i>h</i> <=36, -11<= <i>k</i> <=11, -43<= <i>l</i> <=43          |                                                   |
| Reflections collected             | 101581                                                                 |                                                   |
| Independent reflections           | 18227 [R(int) = 0.1550]                                                |                                                   |
| Max. and min. transmission        | 0.9860 and 0.7460                                                      |                                                   |
| Refinement method                 | Full-matrix least-squares on F <sup>2</sup>                            |                                                   |
| Refinement program                | SHELXL-2018/3 (Sheldrick, 2018)                                        |                                                   |
| Function minimized                | $\Sigma w(F_o^2 - F_c^2)^2$                                            |                                                   |
| Data / restraints / parameters    | 18227 / 19 / 1116                                                      |                                                   |
| Goodness-of-fit on F <sup>2</sup> | 1.042                                                                  |                                                   |
| Final R indices                   | 7657 data; <i>I</i> >2σ( <i>I</i> )                                    | R <sub>1</sub> = 0.0750, wR <sub>2</sub> = 0.1450 |
|                                   | all data                                                               | R <sub>1</sub> = 0.2087, wR <sub>2</sub> = 0.1888 |
| Weighting scheme                  | $w=1/[\sigma^2(F_o^2)+(0.0728P)^2+3.2181P]$ where $P=(F_o^2+2F_c^2)/3$ |                                                   |
| Largest diff. peak and hole       | 1.143 and -1.148 eÅ <sup>-3</sup>                                      |                                                   |
| R.M.S. deviation from mean        | 0.092 eÅ <sup>-3</sup>                                                 |                                                   |

**Table S5. Distances between iron atoms in molecules 3 and 4** (shortest values in *italics* and largest ones in **bold**).

| Distances between metal centers bonded to the same silicon atom (Å)    |                |                  |
|------------------------------------------------------------------------|----------------|------------------|
| <b>3</b>                                                               | Fe1-Fe2        | 6.117(1)         |
|                                                                        | Fe1-Fe3        | 6.093(1)         |
|                                                                        | Fe2-Fe3        | 6.026(1)         |
|                                                                        | <b>Fe4-Fe5</b> | <b>6.164(1)</b>  |
|                                                                        | Fe4-Fe6        | 6.040(1)         |
|                                                                        | <i>Fe5-Fe6</i> | <i>5.401(1)</i>  |
| <b>4</b>                                                               | Fe1-Fe2        | 6.061(2)         |
|                                                                        | <b>Fe1-Fe3</b> | <b>6.160(2)</b>  |
|                                                                        | Fe2-Fe3        | 5.898(2)         |
|                                                                        | Fe4-Fe5        | 6.099(1)         |
|                                                                        | Fe4-Fe6        | 6.201(2)         |
|                                                                        | Fe5-Fe6        | 5.932(2)         |
|                                                                        | <i>Fe7-Fe8</i> | <i>5.806(2)</i>  |
|                                                                        | Fe7-Fe9        | 6.028(2)         |
| Fe8-Fe9                                                                | 5.896(2)       |                  |
| Distances between metal centers bonded to a different silicon atom (Å) |                |                  |
| <b>3</b>                                                               | Fe1-Fe4        | 10.784(1)        |
|                                                                        | Fe1-Fe5        | 11.063(1)        |
|                                                                        | <b>Fe1-Fe6</b> | <b>12.730(1)</b> |
|                                                                        | <i>Fe2-Fe4</i> | <i>6.967(1)</i>  |
|                                                                        | Fe2-Fe5        | 10.201(1)        |
|                                                                        | Fe2-Fe6        | 11.559(1)        |
|                                                                        | Fe3-Fe4        | 8.312(2)         |
|                                                                        | Fe3-Fe5        | 7.261(1)         |
|                                                                        | Fe3-Fe6        | 11.111(1)        |
| <b>4</b>                                                               | Fe1-Fe4        | 10.409(2)        |
|                                                                        | Fe1-Fe5        | 13.456(2)        |
|                                                                        | Fe1-Fe6        | 13.310(2)        |
|                                                                        | Fe1-Fe7        | 12.894(2)        |
|                                                                        | Fe1-Fe8        | 15.623(2)        |
|                                                                        | Fe1-Fe9        | 12.512(2)        |
|                                                                        | Fe2-Fe4        | 8.840(2)         |
|                                                                        | Fe2-Fe5        | 13.809(2)        |
|                                                                        | Fe2-Fe6        | 13.875(2)        |
|                                                                        | Fe2-Fe7        | 15.998(2)        |
|                                                                        | <b>Fe2-Fe8</b> | <b>18.497(2)</b> |
|                                                                        | Fe2-Fe9        | 17.024(2)        |
|                                                                        | Fe3-Fe4        | 6.388(2)         |
|                                                                        | Fe3-Fe5        | 9.042(2)         |
|                                                                        | Fe3-Fe6        | 11.023(2)        |
|                                                                        | Fe3-Fe7        | 12.577(2)        |
|                                                                        | Fe3-Fe8        | 16.656(2)        |
|                                                                        | Fe3-Fe9        | 14.912(2)        |
|                                                                        | Fe4-Fe7        | 10.671(2)        |
|                                                                        | Fe4-Fe8        | 13.909(2)        |
|                                                                        | Fe4-Fe9        | 14.586(2)        |
|                                                                        | Fe5-Fe7        | 8.827(2)         |
|                                                                        | Fe5-Fe8        | 13.651(2)        |
|                                                                        | Fe5-Fe9        | 14.244(2)        |
|                                                                        | <i>Fe6-Fe7</i> | <i>6.224(2)</i>  |
|                                                                        | Fe6-Fe8        | 8.857(2)         |
|                                                                        | Fe6-Fe9        | 11.248(2)        |

#### 4. Electrochemistry of dendritic compounds 1-9<sub>n</sub>

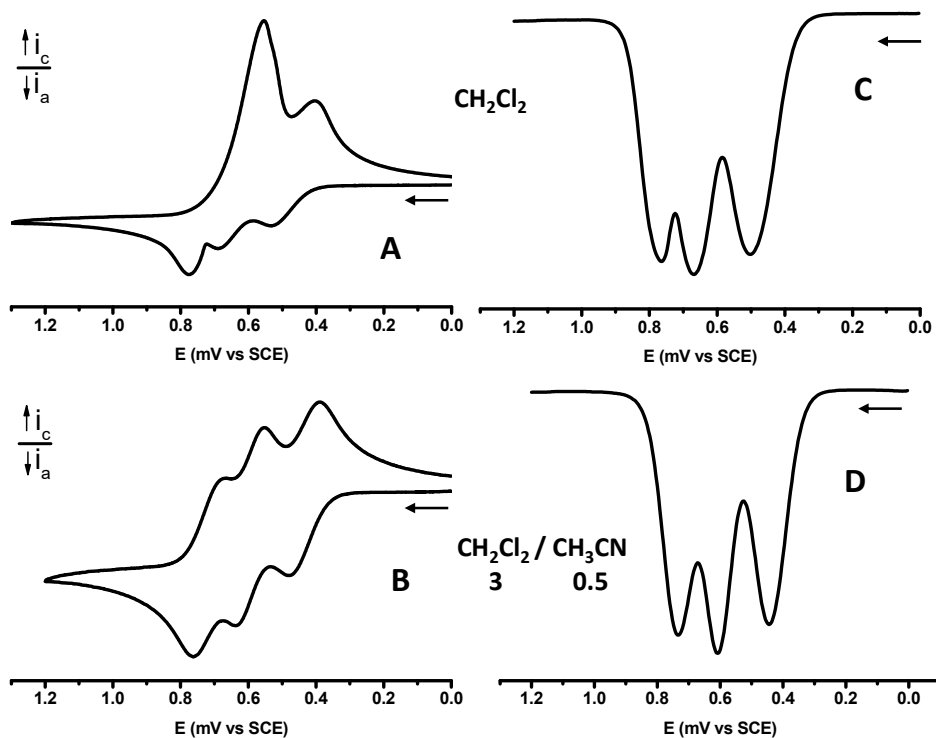

**Figure S36.** CV responses of dendron **3** ( $10^{-4}$  M) containing  $0.1$  M  $[n\text{-Bu}_4\text{N}][\text{PF}_6]$  recorded in:  $\text{CH}_2\text{Cl}_2$  (A) and  $\text{CH}_2\text{Cl}_2/\text{CH}_3\text{CN}$  (3:0.5) (B). SWV responses of dendron **3** in  $\text{CH}_2\text{Cl}_2$  (C) and  $\text{CH}_2\text{Cl}_2/\text{CH}_3\text{CN}$  (3:0.5) (D) with  $[n\text{-Bu}_4\text{N}][\text{PF}_6]$ .

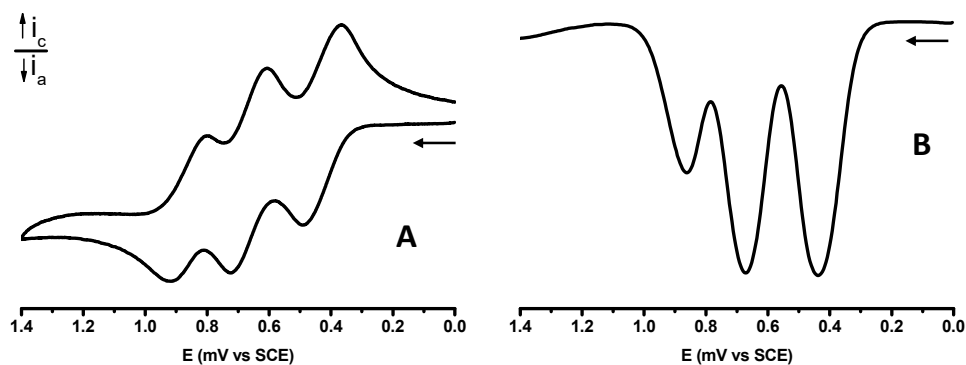

**Figure S37.** CV (A) and SWV (B) of dendron **3** ( $10^{-4}$  M) containing  $0.1$  M  $[n\text{-Bu}_4\text{N}][\text{B}(\text{C}_6\text{F}_5)_4]$  recorded in  $\text{CH}_2\text{Cl}_2$ .

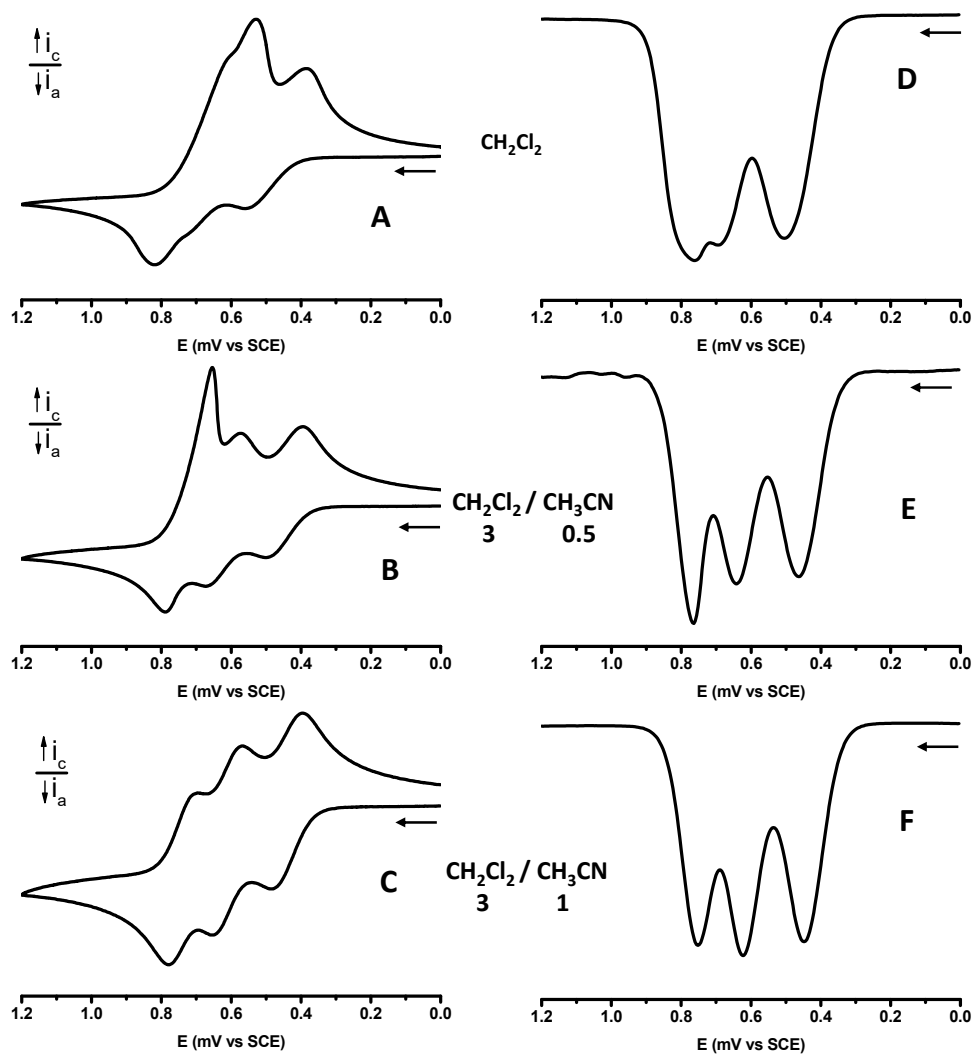

**Figure S38.** CV responses of dendrimer 4 ( $10^{-4}$  M) containing  $0.1$  M  $[n\text{-Bu}_4\text{N}][\text{PF}_6]$  recorded in:  $\text{CH}_2\text{Cl}_2$  (A),  $\text{CH}_2\text{Cl}_2/\text{CH}_3\text{CN}$  (3:05) (B) and  $\text{CH}_2\text{Cl}_2/\text{CH}_3\text{CN}$  (3:1) (C). SWV responses of dendrimer 4 in  $\text{CH}_2\text{Cl}_2$  (D),  $\text{CH}_2\text{Cl}_2/\text{CH}_3\text{CN}$  (3:05) (E) and  $\text{CH}_2\text{Cl}_2/\text{CH}_3\text{CN}$  (3:1) (F) with  $[n\text{-Bu}_4\text{N}][\text{PF}_6]$ .

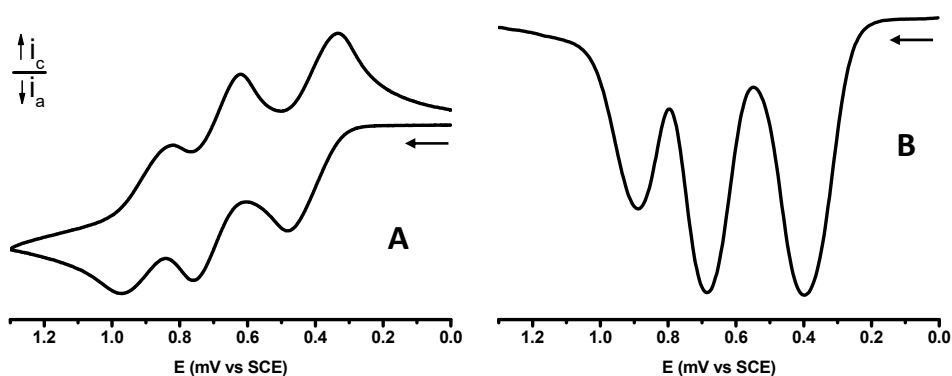

**Figure S39.** CV (A) and SWV (B) of dendrimer 4 ( $10^{-4}$  M) containing  $0.1$  M  $[n\text{-Bu}_4\text{N}][\text{B}(\text{C}_6\text{F}_5)_4]$  recorded in  $\text{CH}_2\text{Cl}_2$ .

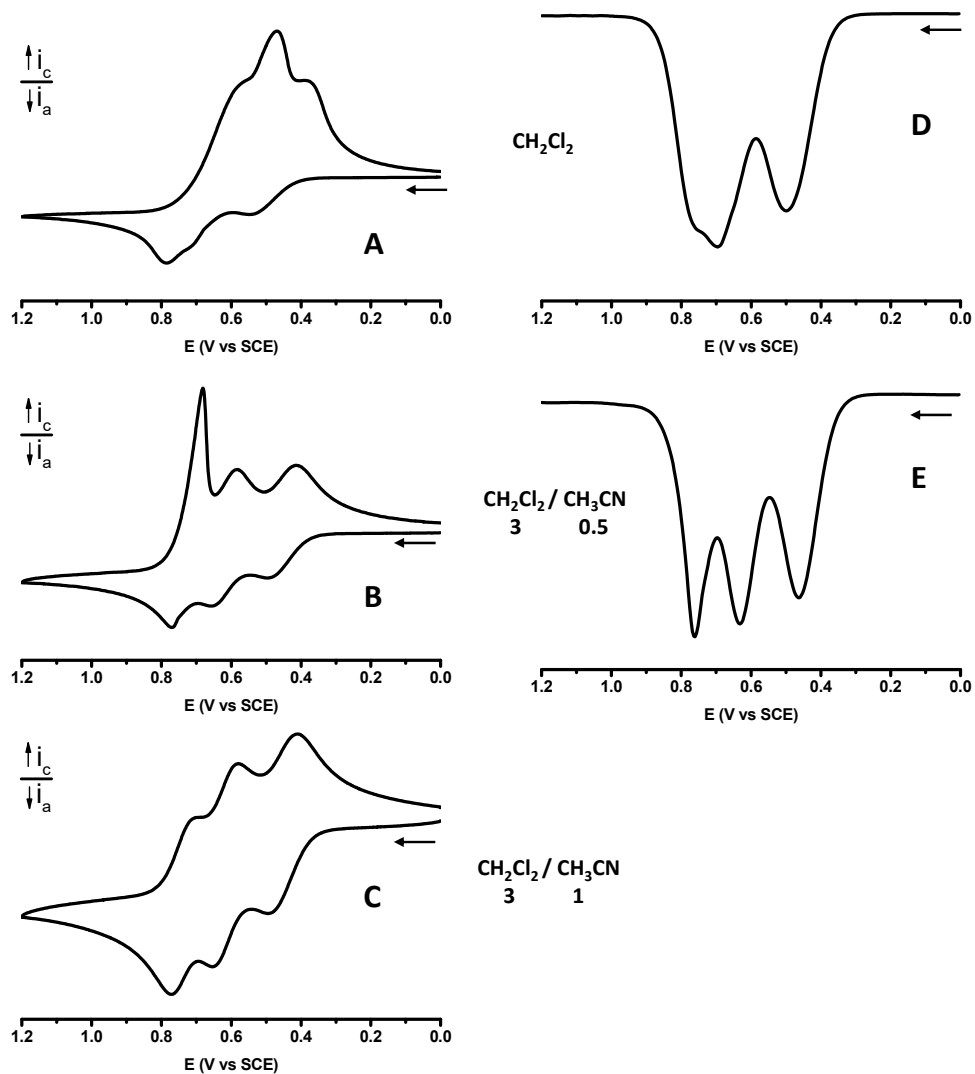

**Figure S40.** CV responses of dendrimer **5** ( $10^{-4}$  M) containing  $0.1$  M  $[n\text{-Bu}_4\text{N}][\text{PF}_6]$  recorded in:  $\text{CH}_2\text{Cl}_2$  (A),  $\text{CH}_2\text{Cl}_2/\text{CH}_3\text{CN}$  (3:05) (B) and  $\text{CH}_2\text{Cl}_2/\text{CH}_3\text{CN}$  (3:1) (C). SWV responses of dendrimer **5** in  $\text{CH}_2\text{Cl}_2$  (D) and  $\text{CH}_2\text{Cl}_2/\text{CH}_3\text{CN}$  (3:05) (E) with  $[n\text{-Bu}_4\text{N}][\text{PF}_6]$ .

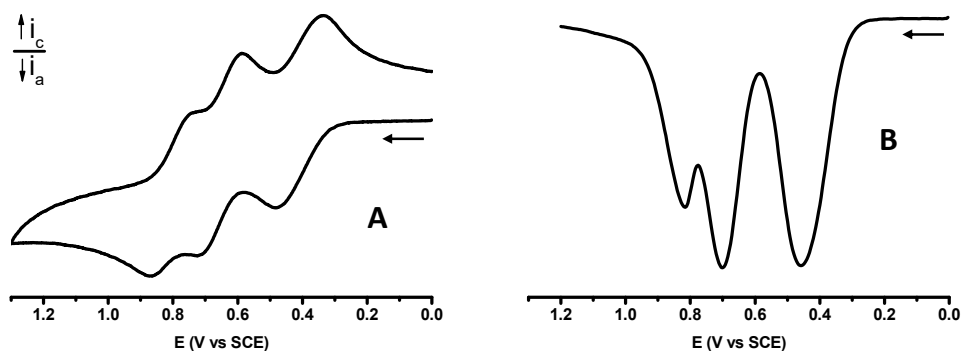

**Figure S41.** CV (A) and SWV (B) of dendrimer **5** ( $10^{-4}$  M) containing  $0.1$  M  $[n\text{-Bu}_4\text{N}][\text{B}(\text{C}_6\text{F}_5)_4]$  recorded in  $\text{CH}_2\text{Cl}_2$ .



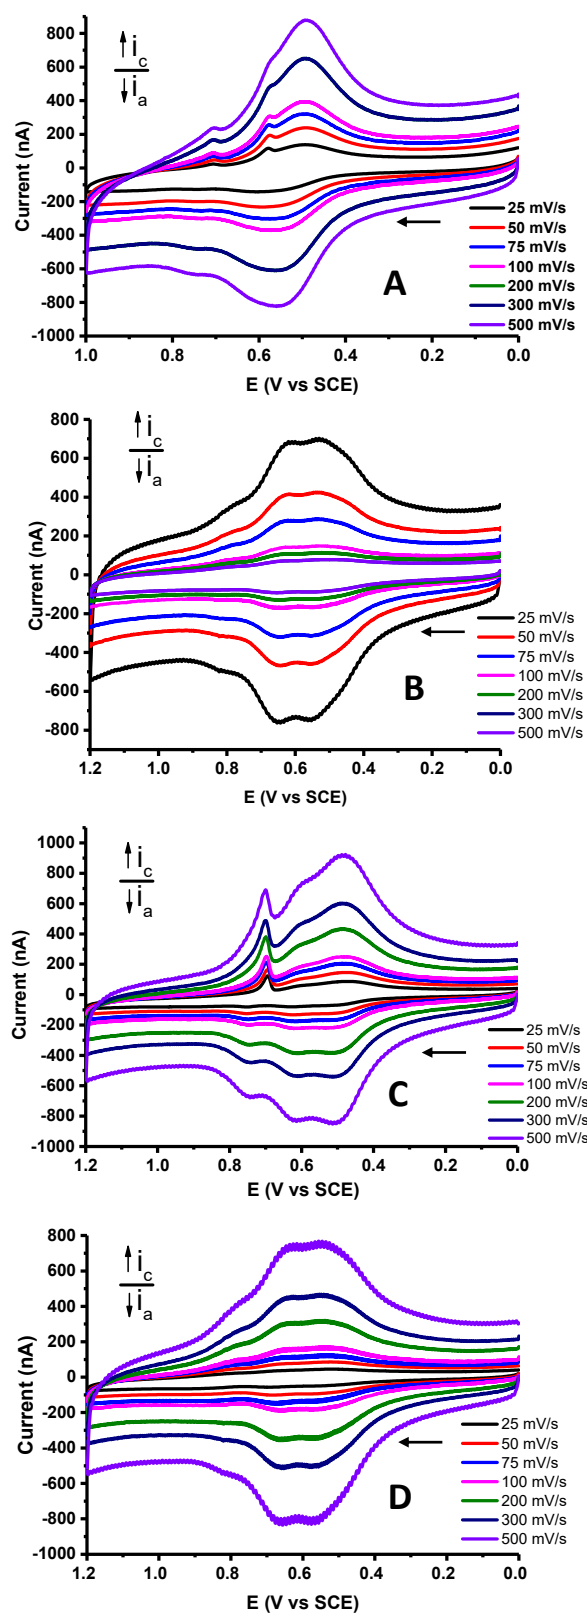

**Figure S42.** (A) CV responses at different scan rates of a Pt-disk electrode modified with films of dendrimer **5**: (A) after 10 successive scans and measured in 0.1M  $[n\text{-Bu}_4\text{N}][\text{PF}_6]/\text{CH}_2\text{Cl}_2$  ( $\Gamma \sim 4.19 \times 10^{-11}$  mol Fe/cm<sup>2</sup>); (B) after 10 successive scans and measured in 0.1M  $[n\text{-Bu}_4\text{N}][\text{B}(\text{C}_6\text{F}_5)_4]/\text{CH}_2\text{Cl}_2$  ( $\Gamma \sim 4.10 \times 10^{-11}$  mol Fe/cm<sup>2</sup>); (C) after 20 successive scans and measured in 0.1M  $[n\text{-Bu}_4\text{N}][\text{PF}_6]/\text{CH}_2\text{Cl}_2$  ( $\Gamma \sim 1.57 \times 10^{-10}$  mol Fe/cm<sup>2</sup>); (D) after 20 successive scans and measured in 0.1M  $[n\text{-Bu}_4\text{N}][\text{B}(\text{C}_6\text{F}_5)_4]/\text{CH}_2\text{Cl}_2$  ( $\Gamma \sim 1.41 \times 10^{-10}$  mol Fe/cm<sup>2</sup>).

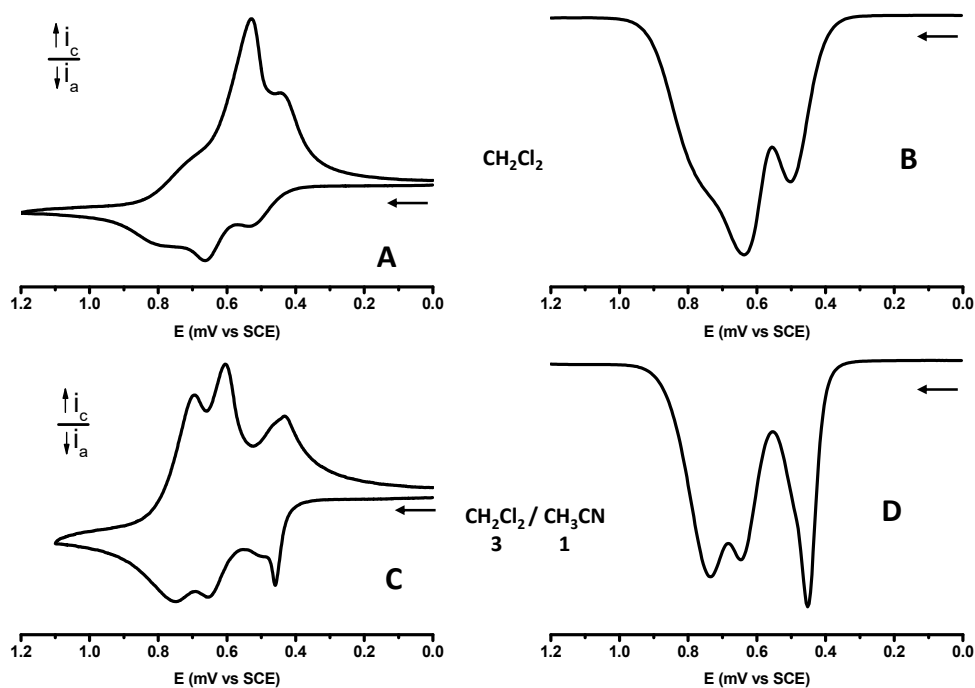

**Figure S43.** CV responses of polymers **7<sub>n</sub>–9<sub>n</sub>** ( $10^{-4}$  M) containing 0.1 M  $[n\text{-Bu}_4\text{N}][\text{PF}_6]$  recorded in:  $\text{CH}_2\text{Cl}_2$  (A) and  $\text{CH}_2\text{Cl}_2/\text{CH}_3\text{CN}$  (3:05) (B). SWV responses of polymers **7<sub>n</sub>–9<sub>n</sub>** in  $\text{CH}_2\text{Cl}_2$  (C) and  $\text{CH}_2\text{Cl}_2/\text{CH}_3\text{CN}$  (3:05) (D) with  $[n\text{-Bu}_4\text{N}][\text{PF}_6]$ .

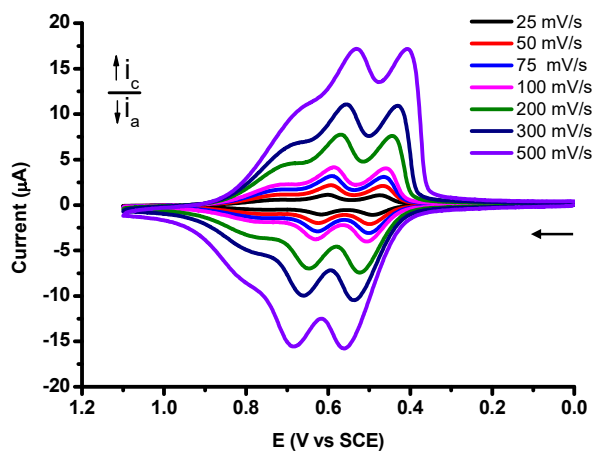

**Figure S44.** CV responses of a Pt-disk electrode modified with a film of polymers **7<sub>n</sub>–9<sub>n</sub>** (10 successive scans and  $\Gamma = 1.20 \times 10^{-9}$  mol Fe/cm<sup>2</sup>) measured in 0.1M  $[n\text{-Bu}_4\text{N}][\text{PF}_6]/\text{CH}_2\text{Cl}_2$  at different scan rates.
